# Supplementary material
Source: PubMed Central journal article supplement (PMC2749473)
Supplement: NIHMS73818-supplement-Supplemental_Figure_1.pdf [file NIHMS73818-supplement-Supplemental_Figure_1.pdf]

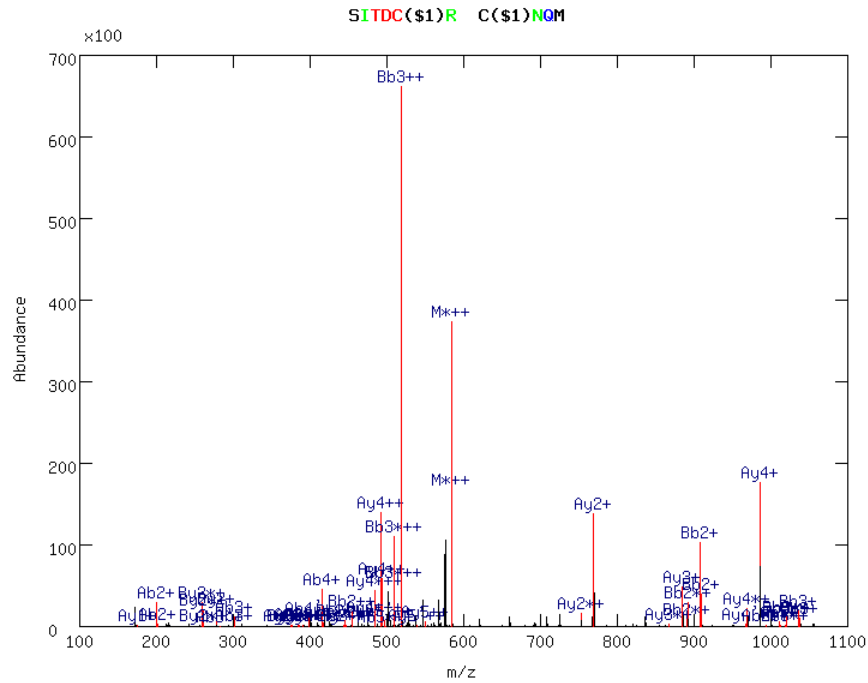

chainA :

| # | b <sup>+++</sup> | b <sup>+++</sup> | b <sup>++</sup> | b <sup>+</sup> | b <sup>++</sup> | b <sup>+</sup> | seq | y <sup>+++</sup> | y <sup>+++</sup> | y <sup>++</sup> | y <sup>+</sup> | y <sup>++</sup> | y <sup>+</sup> | # |
|---|------------------|------------------|-----------------|----------------|-----------------|----------------|-----|------------------|------------------|-----------------|----------------|-----------------|----------------|---|
| 1 | 35.52            | —                | 44.52           | 70.03          | —               | 88.04          | S   | 584.73           | 585.22           | 593.74          | 1168.45        | 1169.44         | 1186.47        | 6 |
| 2 | 92.06            | —                | 101.07          | 183.11         | —               | 201.12         | I   | 541.22           | 541.71           | 550.22          | 1081.42        | 1082.41         | 1099.43        | 5 |
| 3 | 142.58           | —                | 151.59          | 284.16         | —               | 302.17         | T   | 484.67           | 485.17           | 493.68          | 968.34         | 969.32          | 986.35         | 4 |
| 4 | 200.10           | —                | 209.10          | 399.19         | —               | 417.20         | D   | 434.15           | 434.64           | 443.15          | 867.29         | 868.28          | 885.30         | 3 |
| 5 | 497.68           | 498.17           | 506.68          | 994.34         | 995.33          | 1012.35        | C   | 376.64           | 377.13           | 385.64          | 752.26         | 753.25          | 770.27         | 2 |
| 6 | —                | —                | —               | —              | —               | —              | R   | 79.06            | 79.55            | 88.06           | 157.11         | 158.09          | 175.12         | 1 |

chainB :

| # | b <sup>+++</sup> | b <sup>+++</sup> | b <sup>++</sup> | b <sup>+</sup> | b <sup>++</sup> | b <sup>+</sup> | seq | y <sup>+++</sup> | y <sup>+++</sup> | y <sup>++</sup> | y <sup>+</sup> | y <sup>++</sup> | y <sup>+</sup> | # |
|---|------------------|------------------|-----------------|----------------|-----------------|----------------|-----|------------------|------------------|-----------------|----------------|-----------------|----------------|---|
| 1 | —                | 389.65           | 398.16          | —              | 778.29          | 795.31         | C   | —                | —                | —               | —              | —               | —              | 4 |
| 2 | —                | 446.67           | 455.18          | —              | 892.33          | 909.36         | N   | 187.58           | 188.07           | 196.58          | 374.15         | 375.13          | 392.16         | 3 |
| 3 | —                | 510.70           | 519.21          | —              | 1020.39         | 1037.41        | Q   | 130.56           | 131.05           | 139.56          | 260.11         | 261.09          | 278.12         | 2 |
| 4 | —                | —                | —               | —              | —               | —              | M   | 66.53            | —                | 75.53           | 132.05         | —               | 150.06         | 1 |

| Scan# | Charge | Score | pp   | pp2  | Peptide             |
|-------|--------|-------|------|------|---------------------|
| 1293  | 2      | 61    | 17.9 | 53.3 | [26-29]-s-s-[80-85] |



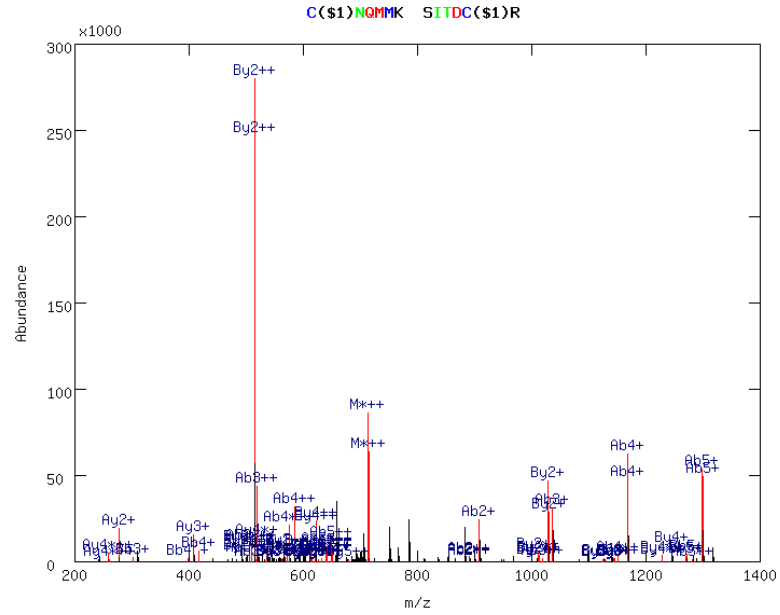

chainA :

| # | b <sup>+++</sup> | b <sup>+++</sup> | b <sup>++</sup> | b <sup>+</sup> | b <sup>++</sup> | b <sup>+</sup> | seq      | y <sup>+++</sup> | y <sup>+++</sup> | y <sup>++</sup> | y <sup>+</sup> | y <sup>++</sup> | y <sup>+</sup> | # |
|---|------------------|------------------|-----------------|----------------|-----------------|----------------|----------|------------------|------------------|-----------------|----------------|-----------------|----------------|---|
| 1 | -                | 389.65           | <b>398.16</b>   | -              | 778.29          | 795.31         | <b>C</b> | <b>714.30</b>    | <b>714.79</b>    | 723.30          | 1427.59        | 1428.57         | 1445.60        | 6 |
| 2 | -                | 446.67           | 455.18          | -              | <b>892.33</b>   | <b>909.36</b>  | <b>N</b> | 317.15           | 317.64           | 326.15          | <b>633.29</b>  | <b>634.27</b>   | <b>651.30</b>  | 5 |
| 3 | -                | <b>510.70</b>    | <b>519.21</b>   | -              | <b>1020.39</b>  | <b>1037.41</b> | <b>Q</b> | <b>260.13</b>    | <b>260.62</b>    | 269.13          | <b>519.24</b>  | <b>520.23</b>   | <b>537.25</b>  | 4 |
| 4 | -                | <b>576.22</b>    | <b>584.73</b>   | -              | <b>1151.43</b>  | <b>1168.45</b> | <b>M</b> | 196.10           | 196.59           | 205.10          | 391.18         | 392.17          | <b>409.19</b>  | 3 |
| 5 | -                | <b>641.74</b>    | <b>650.25</b>   | -              | <b>1282.47</b>  | <b>1299.50</b> | <b>M</b> | 130.58           | 131.07           | 139.58          | <b>260.14</b>  | <b>261.13</b>   | <b>278.15</b>  | 2 |
| 6 | -                | -                | -               | -              | -               | -              | <b>K</b> | 65.06            | 65.55            | 74.06           | 129.10         | 130.09          | 147.11         | 1 |

chainB :

| # | b <sup>+++</sup> | b <sup>+++</sup> | b <sup>++</sup> | b <sup>+</sup> | b <sup>++</sup> | b <sup>+</sup> | seq      | y <sup>+++</sup> | y <sup>+++</sup> | y <sup>++</sup> | y <sup>+</sup> | y <sup>++</sup> | y <sup>+</sup> | # |
|---|------------------|------------------|-----------------|----------------|-----------------|----------------|----------|------------------|------------------|-----------------|----------------|-----------------|----------------|---|
| 1 | 35.52            | -                | 44.52           | 70.03          | -               | 88.04          | <b>S</b> | -                | -                | -               | -              | -               | -              | 6 |
| 2 | 92.06            | -                | 101.07          | 183.11         | -               | 201.12         | <b>I</b> | 670.78           | 671.28           | <b>679.79</b>   | 1340.56        | 1341.54         | 1358.57        | 5 |
| 3 | 142.58           | -                | 151.59          | 284.16         | -               | <b>302.17</b>  | <b>T</b> | <b>614.24</b>    | <b>614.73</b>    | <b>623.25</b>   | <b>1227.47</b> | <b>1228.46</b>  | <b>1245.48</b> | 4 |
| 4 | 200.10           | -                | 209.10          | <b>399.19</b>  | -               | <b>417.20</b>  | <b>D</b> | <b>563.72</b>    | <b>564.21</b>    | <b>572.72</b>   | <b>1126.43</b> | <b>1127.41</b>  | <b>1144.44</b> | 3 |
| 5 | <b>627.24</b>    | <b>627.74</b>    | 636.25          | 1253.48        | 1254.46         | <b>1271.49</b> | <b>C</b> | <b>506.20</b>    | <b>506.70</b>    | <b>515.21</b>   | <b>1011.40</b> | <b>1012.38</b>  | <b>1029.41</b> | 2 |
| 6 | -                | -                | -               | -              | -               | -              | <b>R</b> | 79.06            | 79.55            | 88.06           | 157.11         | 158.09          | 175.12         | 1 |

| Scan# | Charge | Score | pp   | pp2  | Peptide             |
|-------|--------|-------|------|------|---------------------|
| 1331  | 2      | 57    | 21.9 | 38.1 | [26-31]-s-s-[80-85] |

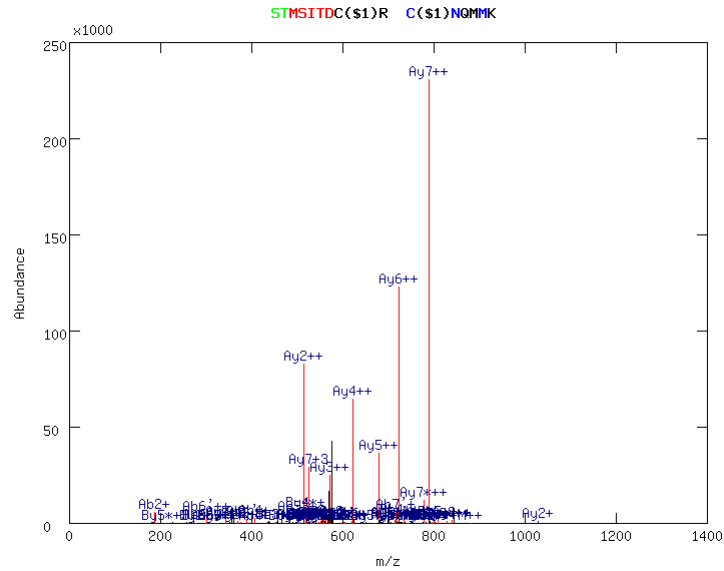

chainA :

| # | b <sup>++3</sup> | b <sup>++</sup> | seq           | y <sup>++3</sup> | y <sup>++</sup> | y <sup>++</sup> | y <sup>++</sup> | y <sup>++</sup> | #        |
|---|------------------|------------------|------------------|------------------|------------------|-----------------|-----------------|-----------------|-----------------|-----------------|---------------|------------------|------------------|------------------|------------------|------------------|-----------------|-----------------|-----------------|-----------------|----------|
| 1 | 24.01            |                  | 30.02            | 35.52            |                  | 44.52           | 70.03           |                 | 88.04           | <b>S</b>        | <b>582.91</b> | <b>583.24</b>    | 588.91           | 873.86           | 874.35           | <b>882.86</b>    | 1746.71         | 1747.69         | 1764.72         |                 | <b>9</b> |
| 2 | 57.70            |                  | 63.70            | 86.04            |                  | 95.05           | 171.08          |                 | <b>189.09</b>   | <b>T</b>        | <b>553.90</b> | <b>554.23</b>    | <b>559.90</b>    | <b>830.34</b>    | <b>830.84</b>    | <b>839.35</b>    | 1659.68         | 1660.66         | 1677.69         |                 | <b>8</b> |
| 3 | 101.38           |                  | 107.38           | 151.56           |                  | 160.57          | <b>302.12</b>   |                 | <b>320.13</b>   | <b>M</b>        | <b>520.22</b> | <b>520.54</b>    | <b>526.22</b>    | <b>779.82</b>    | <b>780.31</b>    | <b>788.82</b>    | 1558.63         | 1559.61         | 1576.64         |                 | <b>7</b> |
| 4 | 130.39           |                  | 136.39           | 195.08           |                  | 204.08          | <b>389.15</b>   |                 | <b>407.16</b>   | <b>S</b>        | 476.54        | 476.86           | 482.54           | <b>714.30</b>    | <b>714.79</b>    | <b>723.30</b>    | 1427.59         | 1428.57         | 1445.60         |                 | <b>6</b> |
| 5 | 168.08           |                  | 174.09           | 251.62           |                  | 260.63          | <b>502.23</b>   |                 | <b>520.24</b>   | <b>I</b>        | 447.52        | 447.85           | <b>453.53</b>    | <b>670.78</b>    | <b>671.28</b>    | <b>679.79</b>    | 1340.56         | 1341.54         | 1358.57         |                 | <b>5</b> |
| 6 | 201.77           |                  | 207.77           | <b>302.14</b>    |                  | <b>311.15</b>   | <b>603.28</b>   |                 | <b>621.29</b>   | <b>T</b>        | 409.83        | 410.16           | 415.83           | <b>614.24</b>    | <b>614.73</b>    | <b>623.25</b>    | 1227.47         | 1228.46         | 1245.48         |                 | <b>4</b> |
| 7 | 240.11           |                  | 246.11           | 359.66           |                  | 368.66          | <b>718.31</b>   |                 | <b>736.32</b>   | <b>D</b>        | <b>376.15</b> | <b>376.48</b>    | 382.15           | <b>563.72</b>    | <b>564.21</b>    | <b>572.72</b>    | 1126.43         | 1127.41         | 1144.44         |                 | <b>3</b> |
| 8 | <b>524.87</b>    | <b>525.20</b>    | <b>530.88</b>    | <b>786.80</b>    | <b>787.30</b>    | <b>795.81</b>   | 1572.60         | 1573.58         | 1590.61         | <b>C</b>        | 337.81        | 338.13           | <b>343.81</b>    | <b>506.20</b>    | <b>506.70</b>    | <b>515.21</b>    | 1011.40         | 1012.38         | <b>1029.41</b>  |                 | <b>2</b> |
| 9 |                  |                  |                  |                  |                  |                 |                 |                 |                 | <b>R</b>        | 53.04         | 53.37            | 59.05            | 79.06            | 79.55            | 88.06            | 157.11          | 158.09          | 175.12          |                 | <b>1</b> |

chainB :

| # | b <sup>++3</sup> | b <sup>++</sup> | seq           | y <sup>++3</sup> | y <sup>++</sup> | y <sup>++</sup> | y <sup>++</sup> | y <sup>++</sup> | # |          |
|---|------------------|------------------|------------------|------------------|------------------|-----------------|-----------------|-----------------|-----------------|-----------------|---------------|------------------|------------------|------------------|------------------|------------------|-----------------|-----------------|-----------------|-----------------|---|----------|
| 1 |                  | 366.47           | <b>372.15</b>    |                  | <b>549.21</b>    | <b>557.72</b>   |                 | 1097.41         | 1114.43         | <b>C</b>        |               |                  |                  |                  |                  |                  |                 |                 |                 |                 |   | <b>6</b> |
| 2 |                  | 404.49           | 410.16           |                  | <b>606.23</b>    | <b>614.74</b>   |                 | 1211.45         | 1228.48         | <b>N</b>        | <b>211.77</b> | <b>212.09</b>    | 217.77           | 317.15           | 317.64           | <b>326.15</b>    | 633.29          | 634.27          | 651.30          |                 |   | <b>5</b> |
| 3 |                  | 447.17           | <b>452.85</b>    |                  | <b>670.26</b>    | 678.77          |                 | 1339.51         | 1356.53         | <b>Q</b>        | 173.75        | 174.08           | 179.76           | 260.13           | 260.62           | 269.13           | <b>519.24</b>   | <b>520.23</b>   | <b>537.25</b>   |                 |   | <b>4</b> |
| 4 |                  | <b>490.85</b>    | 496.53           |                  | <b>735.78</b>    | <b>744.29</b>   |                 | 1470.55         | 1487.58         | <b>M</b>        | 131.07        | 131.39           | 137.07           | 196.10           | 196.59           | 205.10           | 391.18          | 392.17          | 409.19          |                 |   | <b>3</b> |
| 5 |                  | <b>534.53</b>    | 540.21           |                  | <b>801.30</b>    | <b>809.81</b>   |                 | 1601.59         | 1618.62         | <b>M</b>        | 87.39         | 87.71            | 93.39            | 130.58           | 131.07           | 139.58           | 260.14          | 261.13          | <b>278.15</b>   |                 |   | <b>2</b> |
| 6 |                  |                  |                  |                  |                  |                 |                 |                 |                 | <b>K</b>        | 43.71         | 44.03            | 49.71            | 65.06            | 65.55            | 74.06            | 129.10          | 130.09          | 147.11          |                 |   | <b>1</b> |

| Scan# | Charge | Score | pp   | pp2 | Peptide             |
|-------|--------|-------|------|-----|---------------------|
| 1756  | 3      | 41    | 11.3 | 9.9 | [26-31]-s-s-[77-85] |

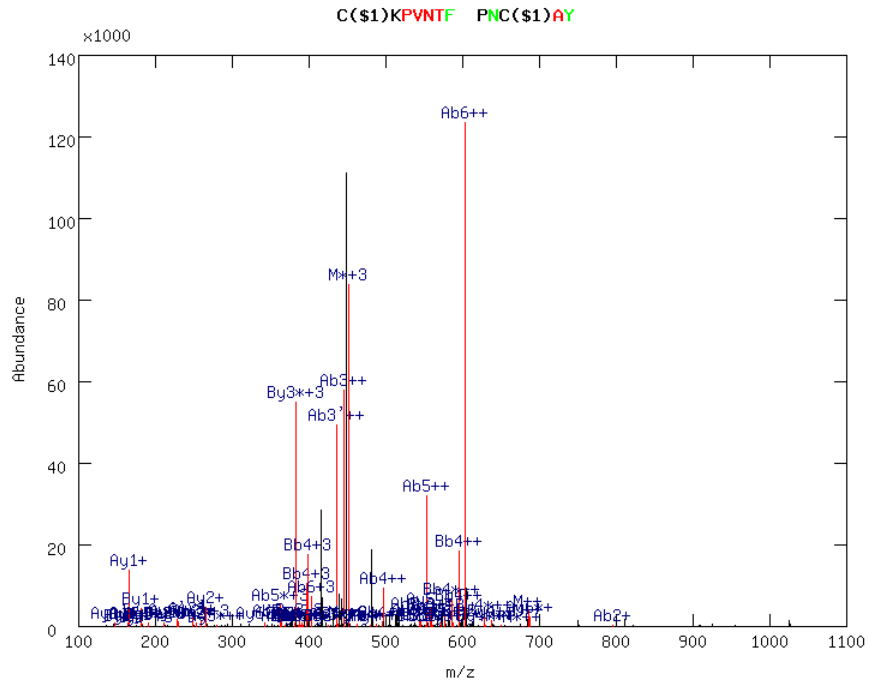

chainA :

| # | b <sup>++3</sup> | b <sup>++3</sup> | b <sup>+3</sup> | b <sup>++</sup> | b <sup>+++</sup> | b <sup>++</sup> | b <sup>++</sup> | b <sup>++</sup> | b <sup>+</sup> | seq | y <sup>++3</sup> | y <sup>++3</sup> | y <sup>+3</sup> | y <sup>++</sup> | y <sup>+++</sup> | y <sup>++</sup> | y <sup>++</sup> | y <sup>+</sup> | #             |   |
|---|------------------|------------------|-----------------|-----------------|------------------|-----------------|-----------------|-----------------|----------------|-----|------------------|------------------|-----------------|-----------------|------------------|-----------------|-----------------|----------------|---------------|---|
| 1 | 217.41           | 217.74           | 223.41          | 325.61          | 326.10           | 334.61          | <b>650.21</b>   | <b>651.19</b>   | 668.22         | C   | <b>452.20</b>    | <b>452.53</b>    | 458.21          | <b>677.80</b>   | <b>678.29</b>    | <b>686.81</b>   | 1354.59         | 1355.58        | 1372.60       | 7 |
| 2 | <b>260.11</b>    | <b>260.43</b>    | 266.11          | <b>389.65</b>   | <b>390.15</b>    | <b>398.66</b>   | 778.30          | 779.29          | <b>796.31</b>  | K   | <b>229.80</b>    | <b>230.13</b>    | 235.80          | <b>344.20</b>   | 344.69           | 353.20          | <b>687.38</b>   | <b>688.37</b>  | 705.39        | 6 |
| 3 | 292.46           | 292.78           | 298.46          | <b>438.18</b>   | <b>438.67</b>    | <b>447.19</b>   | 875.35          | 876.34          | 893.36         | P   | <b>187.10</b>    | 187.43           | <b>193.10</b>   | <b>280.15</b>   | <b>280.64</b>    | 289.15          | <b>559.29</b>   | <b>560.27</b>  | <b>577.30</b> | 5 |
| 4 | 325.48           | 325.81           | 331.48          | <b>487.72</b>   | <b>488.21</b>    | <b>496.72</b>   | 974.42          | 975.41          | 992.43         | V   | 154.75           | 155.08           | 160.75          | 231.62          | 232.11           | 240.63          | <b>462.24</b>   | <b>463.22</b>  | <b>480.25</b> | 4 |
| 5 | <b>363.49</b>    | <b>363.82</b>    | <b>369.50</b>   | <b>544.74</b>   | <b>545.23</b>    | <b>553.74</b>   | 1088.47         | 1089.45         | 1106.48        | N   | 121.73           | 122.06           | 127.73          | <b>182.09</b>   | <b>182.58</b>    | 191.09          | <b>363.17</b>   | <b>364.15</b>  | <b>381.18</b> | 3 |
| 6 | <b>397.18</b>    | <b>397.50</b>    | <b>403.18</b>   | <b>595.26</b>   | <b>595.75</b>    | <b>604.27</b>   | 1189.51         | 1190.50         | 1207.52        | T   | 83.71            | —                | 89.72           | 125.07          | —                | 134.07          | <b>249.12</b>   | —              | <b>267.13</b> | 2 |
| 7 | —                | —                | —               | —               | —                | —               | —               | —               | —              | F   | 50.03            | —                | 56.03           | 74.54           | —                | 83.55           | <b>148.08</b>   | —              | <b>166.09</b> | 1 |

chainB :

| # | b <sup>++3</sup> | b <sup>++3</sup> | b <sup>+3</sup> | b <sup>++</sup> | b <sup>+++</sup> | b <sup>++</sup> | b <sup>++</sup> | b <sup>++</sup> | b <sup>+</sup> | seq | y <sup>++3</sup> | y <sup>++3</sup> | y <sup>+3</sup> | y <sup>++</sup> | y <sup>+++</sup> | y <sup>++</sup> | y <sup>++</sup> | y <sup>+</sup> | #             |   |
|---|------------------|------------------|-----------------|-----------------|------------------|-----------------|-----------------|-----------------|----------------|-----|------------------|------------------|-----------------|-----------------|------------------|-----------------|-----------------|----------------|---------------|---|
| 1 | —                | —                | 33.36           | —               | —                | 49.53           | —               | —               | 98.06          | P   | —                | —                | —               | —               | —                | —               | —               | —              | 5             |   |
| 2 | —                | 65.70            | 71.37           | —               | 98.04            | 106.56          | —               | 195.08          | <b>212.10</b>  | N   | 419.85           | 420.18           | <b>425.86</b>   | <b>629.27</b>   | <b>629.77</b>    | <b>638.28</b>   | 1257.54         | 1258.52        | 1275.55       | 4 |
| 3 | —                | 368.49           | 374.17          | —               | <b>552.24</b>    | <b>560.75</b>   | —               | 1103.47         | 1120.49        | C   | <b>381.84</b>    | <b>382.17</b>    | <b>387.84</b>   | <b>572.25</b>   | <b>572.74</b>    | <b>581.26</b>   | 1143.50         | 1144.48        | 1161.51       | 3 |
| 4 | —                | <b>392.17</b>    | <b>397.85</b>   | —               | <b>587.76</b>    | <b>596.27</b>   | —               | 1174.50         | 1191.53        | A   | 79.04            | —                | 85.04           | 118.06          | —                | 127.06          | 235.11          | —              | <b>253.12</b> | 2 |
| 5 | —                | —                | —               | —               | —                | —               | —               | —               | —              | Y   | 55.36            | —                | 61.37           | 82.54           | —                | 91.54           | <b>164.07</b>   | —              | <b>182.08</b> | 1 |

| Scan# | Charge | Score | pp   | pp2 | Peptide             |
|-------|--------|-------|------|-----|---------------------|
| 1729  | 3      | 42    | 11.1 | 7.9 | [40-46]-s-s-[93-97] |

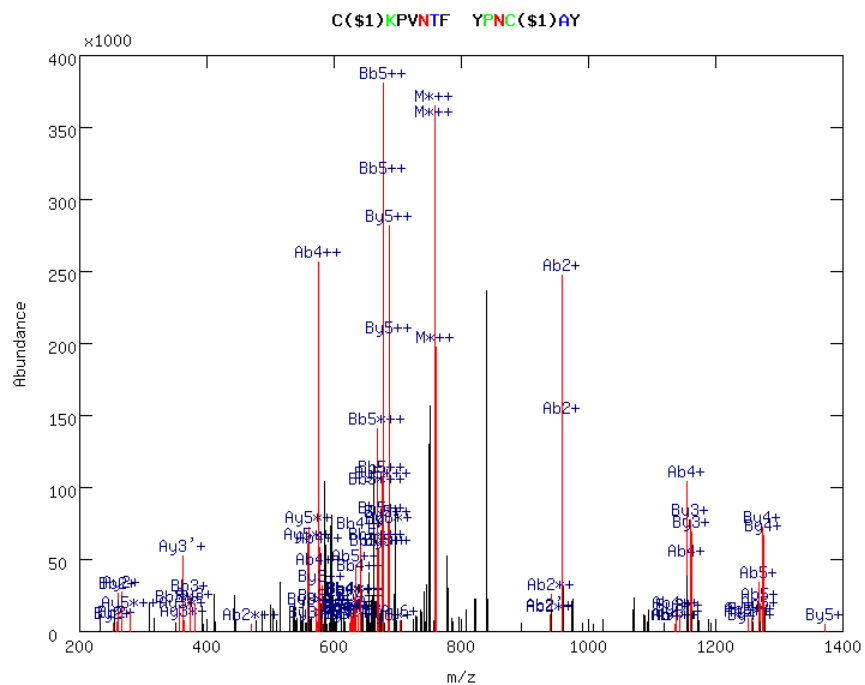

chainA :

| # | b <sup>+++</sup> | b <sup>+++</sup> | b <sup>++</sup> | b <sup>+</sup> | b <sup>+</sup> | b <sup>+</sup> | seq | y <sup>+++</sup> | y <sup>+++</sup> | y <sup>++</sup> | y <sup>+</sup> | y <sup>+</sup> | y <sup>+</sup> | # |
|---|------------------|------------------|-----------------|----------------|----------------|----------------|-----|------------------|------------------|-----------------|----------------|----------------|----------------|---|
| 1 | 407.14           | 407.63           | 416.14          | 813.27         | 814.25         | 831.28         | C   | 759.33           | 759.82           | 768.34          | 1517.66        | 1518.64        | 1535.67        | 7 |
| 2 | 471.19           | 471.68           | 480.19          | 941.36         | 942.35         | 959.38         | K   | 344.20           | 344.69           | 353.20          | 687.38         | 688.37         | 705.39         | 6 |
| 3 | 519.71           | 520.20           | 528.72          | 1038.42        | 1039.40        | 1056.43        | P   | 280.15           | 280.64           | 289.15          | 559.29         | 560.27         | 577.30         | 5 |
| 4 | 569.25           | 569.74           | 578.25          | 1137.49        | 1138.47        | 1155.50        | V   | 231.62           | 232.11           | 240.63          | 462.24         | 463.22         | 480.25         | 4 |
| 5 | 626.27           | 626.76           | 635.27          | 1251.53        | 1252.51        | 1269.54        | N   | 182.09           | 182.58           | 191.09          | 363.17         | 364.15         | 381.18         | 3 |
| 6 | 676.79           | 677.28           | 685.80          | 1352.58        | 1353.56        | 1370.59        | T   | 125.07           | —                | 134.07          | 249.12         | —              | 267.13         | 2 |
| 7 | —                | —                | —               | —              | —              | —              | F   | 74.54            | —                | 83.55           | 148.08         | —              | 166.09         | 1 |

chainB :

| # | b <sup>+++</sup> | b <sup>+++</sup> | b <sup>++</sup> | b <sup>+</sup> | b <sup>+</sup> | b <sup>+</sup> | seq | y <sup>+++</sup> | y <sup>+++</sup> | y <sup>++</sup> | y <sup>+</sup> | y <sup>+</sup> | y <sup>+</sup> | # |
|---|------------------|------------------|-----------------|----------------|----------------|----------------|-----|------------------|------------------|-----------------|----------------|----------------|----------------|---|
| 1 | —                | —                | 82.54           | —              | —              | 164.07         | Y   | —                | —                | —               | —              | —              | —              | 6 |
| 2 | —                | —                | 131.07          | —              | —              | 261.12         | P   | 677.80           | 678.29           | 686.81          | 1354.59        | 1355.58        | 1372.60        | 5 |
| 3 | —                | 179.57           | 188.09          | —              | 358.14         | 375.17         | N   | 629.27           | 629.77           | 638.28          | 1257.54        | 1258.52        | 1275.55        | 4 |
| 4 | —                | 633.77           | 642.28          | —              | 1266.53        | 1283.56        | C   | 572.25           | 572.74           | 581.26          | 1143.50        | 1144.48        | 1161.51        | 3 |
| 5 | —                | 669.29           | 677.80          | —              | 1337.57        | 1354.59        | A   | 118.06           | —                | 127.06          | 235.11         | —              | 253.12         | 2 |
| 6 | —                | —                | —               | —              | —              | —              | Y   | 82.54            | —                | 91.54           | 164.07         | —              | 182.08         | 1 |

| Scan# | Charge | Score | pp   | pp2  | Peptide             |
|-------|--------|-------|------|------|---------------------|
| 1915  | 2      | 130   | 18.9 | 44.3 | [40-46]-s-s-[92-97] |

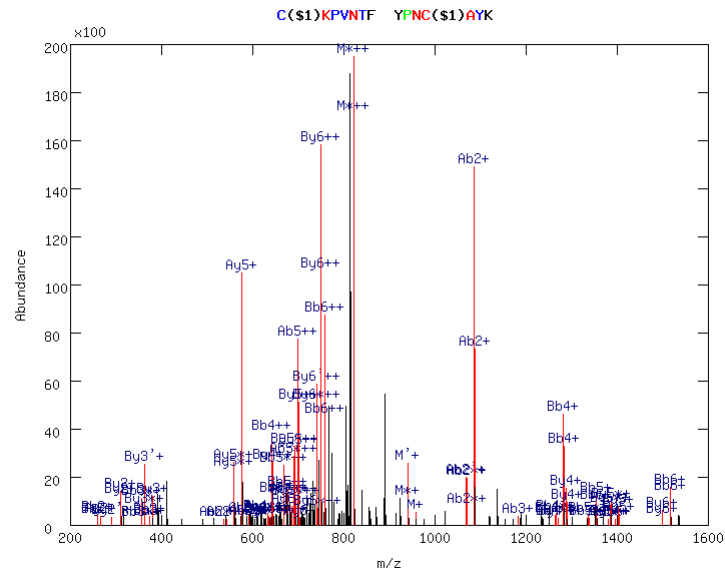

chainA :

| # | b <sup>++</sup> | b <sup>+++</sup> | b <sup>++</sup> | b <sup>+</sup> | b <sup>++</sup> | b <sup>+</sup> | seq | y <sup>+++</sup> | y <sup>+++</sup> | y <sup>++</sup> | y <sup>+</sup> | y <sup>++</sup> | y <sup>+</sup> | # |
|---|-----------------|------------------|-----------------|----------------|-----------------|----------------|-----|------------------|------------------|-----------------|----------------|-----------------|----------------|---|
| 1 | 471.19          | 471.68           | 480.19          | 941.36         | 942.35          | 959.38         | C   | 823.38           | 823.87           | 832.38          | 1645.75        | 1646.73         | 1663.76        | 7 |
| 2 | 535.23          | 535.73           | 544.24          | 1069.46        | 1070.44         | 1087.47        | K   | 344.20           | 344.69           | 353.20          | 687.38         | 688.37          | 705.39         | 6 |
| 3 | 583.76          | 584.25           | 592.77          | 1166.51        | 1167.50         | 1184.52        | P   | 280.15           | 280.64           | 289.15          | 559.29         | 560.27          | 577.30         | 5 |
| 4 | 633.29          | 633.79           | 642.30          | 1265.58        | 1266.57         | 1283.59        | V   | 231.62           | 232.11           | 240.63          | 462.24         | 463.22          | 480.25         | 4 |
| 5 | 690.32          | 690.81           | 699.32          | 1379.62        | 1380.61         | 1397.63        | N   | 182.09           | 182.58           | 191.09          | 363.17         | 364.15          | 381.18         | 3 |
| 6 | 740.84          | 741.33           | 749.85          | 1480.67        | 1481.66         | 1498.68        | T   | 125.07           | —                | 134.07          | 249.12         | —               | 267.13         | 2 |
| 7 | —               | —                | —               | —              | —               | —              | F   | 74.54            | —                | 83.55           | 148.08         | —               | 166.09         | 1 |

chainB :

| # | b <sup>+++</sup> | b <sup>+++</sup> | b <sup>++</sup> | b <sup>+</sup> | b <sup>++</sup> | b <sup>+</sup> | seq | y <sup>+++</sup> | y <sup>+++</sup> | y <sup>++</sup> | y <sup>+</sup> | y <sup>++</sup> | y <sup>+</sup> | # |
|---|------------------|------------------|-----------------|----------------|-----------------|----------------|-----|------------------|------------------|-----------------|----------------|-----------------|----------------|---|
| 1 | —                | —                | 82.54           | —              | —               | 164.07         | Y   | —                | —                | —               | —              | —               | —              | 7 |
| 2 | —                | —                | 131.07          | —              | —               | 261.12         | P   | 741.85           | 742.34           | 750.85          | 1482.69        | 1483.67         | 1500.70        | 6 |
| 3 | —                | 179.57           | 188.09          | —              | 358.14          | 375.17         | N   | 693.32           | 693.81           | 702.33          | 1385.63        | 1386.62         | 1403.65        | 5 |
| 4 | —                | 633.77           | 642.28          | —              | 1266.53         | 1283.56        | C   | 636.30           | 636.79           | 645.31          | 1271.59        | 1272.58         | 1289.60        | 4 |
| 5 | —                | 669.29           | 677.80          | —              | 1337.57         | 1354.59        | A   | 182.11           | 182.60           | 191.11          | 363.20         | 364.19          | 381.21         | 3 |
| 6 | —                | 750.82           | 759.33          | —              | 1500.63         | 1517.66        | Y   | 146.59           | 147.08           | 155.59          | 292.17         | 293.15          | 310.18         | 2 |
| 7 | —                | —                | —               | —              | —               | —              | K   | 65.06            | 65.55            | 74.06           | 129.10         | 130.09          | 147.11         | 1 |

| Scan# | Charge | Score | pp   | pp2  | Peptide             |
|-------|--------|-------|------|------|---------------------|
| 1709  | 2      | 95    | 16.6 | 26.2 | [40-46]-s-s-[92-98] |





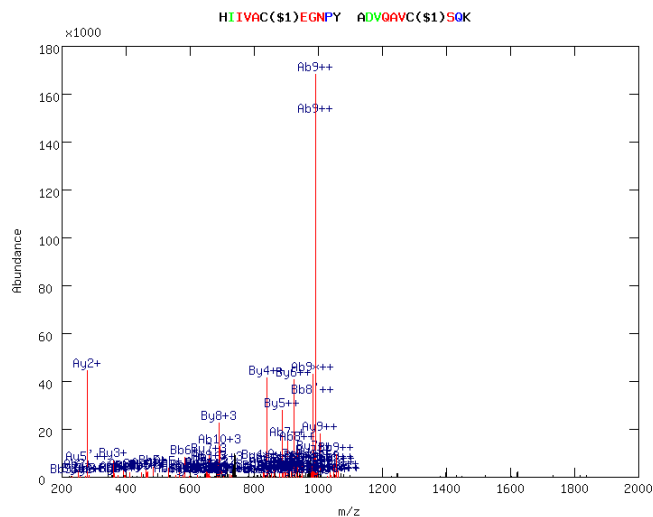

chainA :

| #  | b*3    | b*3    | b*3    | b**     | b**     | b**     | b*      | b*      | b*      | seq | y*3    | y*3    | y*3    | y**     | y**     | y**     | y*      | y*      | y*      | #  |
|----|--------|--------|--------|---------|---------|---------|---------|---------|---------|-----|--------|--------|--------|---------|---------|---------|---------|---------|---------|----|
| 1  | -      | -      | 46.69  | -       | -       | 69.54   | -       | -       | 138.07  | H   | 748.36 | 748.69 | 754.36 | 1122.03 | 1122.53 | 1131.04 | 2243.06 | 2244.04 | 2261.07 | 11 |
| 2  | -      | -      | 84.39  | -       | -       | 126.08  | -       | -       | 251.15  | I   | 702.67 | 703.00 | 708.68 | 1053.50 | 1054.00 | 1062.51 | 2106.00 | 2106.98 | 2124.01 | 10 |
| 3  | -      | -      | 122.08 | -       | -       | 182.62  | -       | -       | 364.23  | I   | 664.98 | 665.31 | 670.98 | 996.96  | 997.45  | 1005.97 | 1992.92 | 1993.90 | 2010.93 | 9  |
| 4  | -      | -      | 155.11 | -       | -       | 232.16  | -       | -       | 463.30  | V   | 627.28 | 627.61 | 633.29 | 940.42  | 940.91  | 949.43  | 1879.83 | 1880.82 | 1897.84 | 8  |
| 5  | -      | -      | 178.79 | -       | -       | 267.67  | -       | -       | 534.34  | A   | 594.26 | 594.59 | 600.26 | 890.89  | 891.38  | 899.89  | 1780.76 | 1781.75 | 1798.77 | 7  |
| 6  | 555.61 | 555.94 | 561.62 | 832.92  | 833.41  | 841.92  | 1664.83 | 1665.81 | 1682.84 | C   | 570.58 | 570.91 | 576.58 | 855.37  | 855.86  | 864.37  | 1709.73 | 1710.71 | 1727.74 | 6  |
| 7  | 598.63 | 598.96 | 604.63 | 897.44  | 897.93  | 906.44  | 1793.87 | 1794.85 | 1811.88 | E   | 187.75 | 188.08 | 193.75 | 281.12  | 281.61  | 290.12  | 561.23  | 562.21  | 579.24  | 5  |
| 8  | 617.63 | 617.96 | 623.64 | 925.95  | 926.44  | 934.95  | 1850.89 | 1851.87 | 1868.90 | G   | 144.73 | 145.06 | 150.74 | 216.60  | 217.09  | 225.60  | 432.19  | 433.17  | 450.20  | 4  |
| 9  | 655.65 | 655.98 | 661.65 | 982.97  | 983.46  | 991.98  | 1964.93 | 1965.92 | 1982.94 | N   | 125.73 | 126.06 | 131.73 | 188.09  | 188.58  | 197.09  | 375.17  | 376.15  | 393.18  | 3  |
| 10 | 688.00 | 688.33 | 694.00 | 1031.50 | 1031.99 | 1040.50 | 2061.99 | 2062.97 | 2080.00 | P   | 87.71  | -      | 93.72  | 131.07  | -       | 140.07  | 261.12  | -       | 279.13  | 2  |
| 11 | -      | -      | -      | -       | -       | -       | -       | -       | -       | Y   | 55.36  | -      | 61.37  | 82.54   | -       | 91.54   | 164.07  | -       | 182.08  | 1  |

chainB :

| #  | b*3    | b*3    | b*3    | b**     | b**     | b**     | b*      | b*      | b*      | seq | y*3    | y*3    | y*3    | y**     | y**     | y**     | y*      | y*      | y*      | #  |
|----|--------|--------|--------|---------|---------|---------|---------|---------|---------|-----|--------|--------|--------|---------|---------|---------|---------|---------|---------|----|
| 1  | -      | -      | 24.69  | -       | -       | 36.53   | -       | -       | 72.04   | A   | -      | -      | -      | -       | -       | -       | -       | -       | -       | 10 |
| 2  | 57.03  | -      | 63.03  | 85.03   | -       | 94.04   | 169.06  | -       | 187.07  | D   | 724.68 | 725.01 | 730.68 | 1086.51 | 1087.01 | 1095.52 | 2172.02 | 2173.01 | 2190.03 | 9  |
| 3  | 90.05  | -      | 96.05  | 134.57  | -       | 143.57  | 268.13  | -       | 286.14  | V   | 686.34 | 686.66 | 692.34 | 1029.00 | 1029.49 | 1038.01 | 2056.99 | 2057.98 | 2075.01 | 8  |
| 4  | 132.73 | 133.06 | 138.74 | 198.60  | 199.09  | 207.60  | 396.19  | 397.17  | 414.20  | Q   | 653.31 | 653.64 | 659.32 | 979.47  | 979.96  | 988.47  | 1957.93 | 1958.91 | 1975.94 | 7  |
| 5  | 156.41 | 156.74 | 162.42 | 234.12  | 234.61  | 243.12  | 467.23  | 468.21  | 485.24  | A   | 610.63 | 610.96 | 616.63 | 915.44  | 915.93  | 924.44  | 1829.87 | 1830.85 | 1847.88 | 6  |
| 6  | 189.44 | 189.76 | 195.44 | 283.65  | 284.14  | 292.66  | 566.29  | 567.28  | 584.30  | V   | 586.95 | 587.28 | 592.95 | 879.92  | 880.41  | 888.92  | 1758.83 | 1759.81 | 1776.84 | 5  |
| 7  | 627.96 | 628.29 | 633.96 | 941.44  | 941.93  | 950.44  | 1881.86 | 1882.85 | 1899.87 | C   | 553.93 | 554.25 | 559.93 | 830.39  | 830.88  | 839.39  | 1659.76 | 1660.75 | 1677.77 | 4  |
| 8  | 656.97 | 657.30 | 662.97 | 984.95  | 985.44  | 993.96  | 1968.89 | 1969.88 | 1986.91 | S   | 115.40 | 115.73 | 121.41 | 172.60  | 173.09  | 181.61  | 344.19  | 345.18  | 362.20  | 3  |
| 9  | 699.66 | 699.98 | 705.66 | 1048.98 | 1049.47 | 1057.99 | 2096.95 | 2097.94 | 2114.96 | Q   | 86.39  | 86.72  | 92.40  | 129.08  | 129.58  | 138.09  | 257.16  | 258.15  | 275.17  | 2  |
| 10 | -      | -      | -      | -       | -       | -       | -       | -       | -       | K   | 43.71  | 44.03  | 49.71  | 65.06   | 65.55   | 74.06   | 129.10  | 130.09  | 147.11  | 1  |

| Scan# | Charge | Score | pp   | pp2  | Peptide               |
|-------|--------|-------|------|------|-----------------------|
| 1593  | 3      | 75    | 11.0 | 29.8 | [52-61]-s-s-[105-115] |









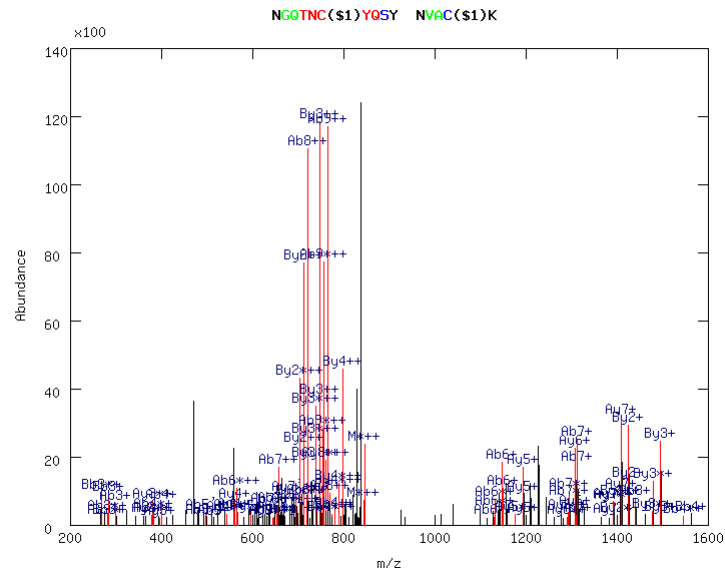

chainA :

| #  | b <sup>+++</sup> | b <sup>+++</sup> | b <sup>++</sup> | b <sup>++</sup> | b <sup>++</sup> | b <sup>+</sup> | seq | y <sup>+++</sup> | y <sup>+++</sup> | y <sup>++</sup> | y <sup>++</sup> | y <sup>++</sup> | y <sup>+</sup> | #  |
|----|------------------|------------------|-----------------|-----------------|-----------------|----------------|-----|------------------|------------------|-----------------|-----------------|-----------------|----------------|----|
| 1  | —                | 49.52            | 58.03           | —               | 98.02           | 115.05         | N   | 845.85           | 846.34           | 854.86          | 1690.70         | 1691.68         | 1708.71        | 10 |
| 2  | —                | 78.03            | 86.54           | —               | 155.05          | 172.07         | G   | 788.83           | 789.32           | 797.84          | 1576.65         | 1577.64         | 1594.66        | 9  |
| 3  | —                | 142.06           | 150.57          | —               | 283.10          | 300.13         | Q   | 760.32           | 760.81           | 769.32          | 1519.63         | 1520.61         | 1537.64        | 8  |
| 4  | 192.09           | 192.58           | 201.09          | 383.17          | 384.15          | 401.18         | T   | 696.29           | 696.78           | 705.30          | 1391.57         | 1392.56         | 1409.58        | 7  |
| 5  | 249.11           | 249.60           | 258.11          | 497.21          | 498.19          | 515.22         | N   | 645.77           | 646.26           | 654.77          | 1290.52         | 1291.51         | 1308.54        | 6  |
| 6  | 566.24           | 566.73           | 575.24          | 1131.47         | 1132.45         | 1149.48        | C   | 588.74           | 589.24           | 597.75          | 1176.48         | 1177.47         | 1194.49        | 5  |
| 7  | 647.77           | 648.26           | 656.77          | 1294.53         | 1295.51         | 1312.54        | Y   | 271.62           | 272.11           | 280.62          | 542.23          | 543.21          | 560.24         | 4  |
| 8  | 711.80           | 712.29           | 720.80          | 1422.59         | 1423.57         | 1440.60        | Q   | 190.08           | 190.58           | 199.09          | 379.16          | 380.15          | 397.17         | 3  |
| 9  | 755.31           | 755.81           | 764.32          | 1509.62         | 1510.61         | 1527.63        | S   | 126.06           | —                | 135.06          | 251.10          | —               | 269.11         | 2  |
| 10 | —                | —                | —               | —               | —               | —              | Y   | 82.54            | —                | 91.54           | 164.07          | —               | 182.08         | 1  |

chainB :

| # | b <sup>+++</sup> | b <sup>+++</sup> | b <sup>++</sup> | b <sup>++</sup> | b <sup>++</sup> | b <sup>+</sup> | seq | y <sup>+++</sup> | y <sup>+++</sup> | y <sup>++</sup> | y <sup>++</sup> | y <sup>++</sup> | y <sup>+</sup> | # |
|---|------------------|------------------|-----------------|-----------------|-----------------|----------------|-----|------------------|------------------|-----------------|-----------------|-----------------|----------------|---|
| 1 | —                | 49.52            | 58.03           | —               | 98.02           | 115.05         | N   | —                | —                | —               | —               | —               | —              | 5 |
| 2 | —                | 99.05            | 107.56          | —               | 197.09          | 214.12         | V   | 788.83           | 789.32           | 797.84          | 1576.65         | 1577.64         | 1594.66        | 4 |
| 3 | —                | 134.57           | 143.08          | —               | 268.13          | 285.16         | A   | 739.30           | 739.79           | 748.30          | 1477.58         | 1478.57         | 1495.59        | 3 |
| 4 | —                | 773.29           | 781.80          | —               | 1545.57         | 1562.60        | C   | 703.78           | 704.27           | 712.78          | 1406.55         | 1407.53         | 1424.56        | 2 |
| 5 | —                | —                | —               | —               | —               | —              | K   | 65.06            | 65.55            | 74.06           | 129.10          | 130.09          | 147.11         | 1 |

| Scan# | Charge | Score | pp   | pp2  | Peptide             |
|-------|--------|-------|------|------|---------------------|
| 1405  | 2      | 79    | 19.3 | 22.2 | [62-66]-s-s-[67-76] |



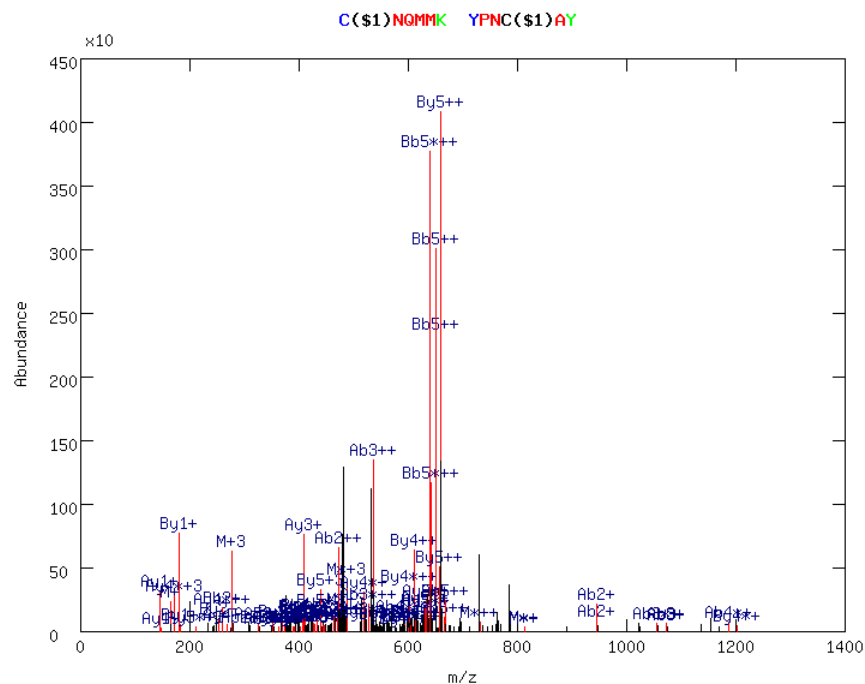

chainA :

| # | b <sup>++3</sup> | b <sup>++3</sup> | b <sup>+3</sup> | b <sup>++</sup> | b <sup>+++</sup> | b <sup>++</sup> | b <sup>+</sup> | b <sup>++</sup> | b <sup>+</sup> | seq | y <sup>++3</sup> | y <sup>++3</sup> | y <sup>+3</sup> | y <sup>++</sup> | y <sup>+++</sup> | y <sup>++</sup> | y <sup>+</sup> | y <sup>++</sup> | y <sup>+</sup> | # |
|---|------------------|------------------|-----------------|-----------------|------------------|-----------------|----------------|-----------------|----------------|-----|------------------|------------------|-----------------|-----------------|------------------|-----------------|----------------|-----------------|----------------|---|
| 1 | —                | 272.09           | <b>277.77</b>   | —               | <b>407.63</b>    | <b>416.14</b>   | —              | <b>814.25</b>   | 831.28         | C   | <b>488.52</b>    | <b>488.85</b>    | 494.53          | <b>732.28</b>   | <b>732.77</b>    | 741.29          | 1463.56        | 1464.54         | 1481.57        | 6 |
| 2 | —                | <b>310.10</b>    | 315.78          | —               | <b>464.65</b>    | <b>473.17</b>   | —              | 928.30          | <b>945.32</b>  | N   | <b>211.77</b>    | <b>212.09</b>    | 217.77          | 317.15          | 317.64           | <b>326.15</b>   | <b>633.29</b>  | <b>634.27</b>   | <b>651.30</b>  | 5 |
| 3 | —                | <b>352.79</b>    | 358.47          | —               | <b>528.68</b>    | <b>537.19</b>   | —              | <b>1056.36</b>  | <b>1073.38</b> | Q   | <b>173.75</b>    | <b>174.08</b>    | 179.76          | <b>260.13</b>   | <b>260.62</b>    | <b>269.13</b>   | <b>519.24</b>  | <b>520.23</b>   | <b>537.25</b>  | 4 |
| 4 | —                | 396.47           | <b>402.15</b>   | —               | <b>594.20</b>    | <b>602.72</b>   | —              | <b>1187.40</b>  | <b>1204.42</b> | M   | 131.07           | 131.39           | 137.07          | 196.10          | 196.59           | 205.10          | <b>391.18</b>  | <b>392.17</b>   | <b>409.19</b>  | 3 |
| 5 | —                | <b>440.15</b>    | <b>445.83</b>   | —               | <b>659.72</b>    | <b>668.24</b>   | —              | 1318.44         | 1335.46        | M   | 87.39            | 87.71            | 93.39           | 130.58          | 131.07           | 139.58          | <b>260.14</b>  | <b>261.13</b>   | <b>278.15</b>  | 2 |
| 6 | —                | —                | —               | —               | —                | —               | —              | —               | —              | K   | 43.71            | 44.03            | 49.71           | 65.06           | 65.55            | 74.06           | 129.10         | 130.09          | <b>147.11</b>  | 1 |

chainB :

| # | b <sup>++3</sup> | b <sup>++3</sup> | b <sup>+3</sup> | b <sup>++</sup> | b <sup>+++</sup> | b <sup>++</sup> | b <sup>+</sup> | b <sup>++</sup> | b <sup>+</sup> | seq | y <sup>++3</sup> | y <sup>++3</sup> | y <sup>+3</sup> | y <sup>++</sup> | y <sup>+++</sup> | y <sup>++</sup> | y <sup>+</sup> | y <sup>++</sup> | y <sup>+</sup> | # |
|---|------------------|------------------|-----------------|-----------------|------------------|-----------------|----------------|-----------------|----------------|-----|------------------|------------------|-----------------|-----------------|------------------|-----------------|----------------|-----------------|----------------|---|
| 1 | —                | —                | 55.36           | —               | —                | 82.54           | —              | —               | <b>164.07</b>  | Y   | —                | —                | —               | —               | —                | —               | —              | —               | —              | 6 |
| 2 | —                | —                | 87.71           | —               | —                | 131.07          | —              | —               | <b>261.12</b>  | P   | <b>434.17</b>    | <b>434.50</b>    | <b>440.17</b>   | <b>650.75</b>   | <b>651.24</b>    | <b>659.76</b>   | 1300.49        | 1301.48         | 1318.51        | 5 |
| 3 | —                | 120.05           | 125.73          | —               | 179.57           | 188.09          | —              | 358.14          | <b>375.17</b>  | N   | <b>401.82</b>    | <b>402.15</b>    | <b>407.82</b>   | <b>602.22</b>   | <b>602.72</b>    | <b>611.23</b>   | <b>1203.44</b> | <b>1204.43</b>  | 1221.45        | 4 |
| 4 | —                | 404.82           | <b>410.49</b>   | —               | <b>606.72</b>    | <b>615.23</b>   | —              | 1212.43         | 1229.46        | C   | <b>363.80</b>    | <b>364.13</b>    | <b>369.81</b>   | 545.20          | 545.70           | <b>554.21</b>   | 1089.40        | 1090.38         | 1107.41        | 3 |
| 5 | —                | <b>428.49</b>    | <b>434.17</b>   | —               | <b>642.24</b>    | <b>650.75</b>   | —              | 1283.47         | 1300.49        | A   | 79.04            | —                | 85.04           | 118.06          | —                | 127.06          | 235.11         | —               | <b>253.12</b>  | 2 |
| 6 | —                | —                | —               | —               | —                | —               | —              | —               | —              | Y   | 55.36            | —                | 61.37           | 82.54           | —                | 91.54           | <b>164.07</b>  | —               | <b>182.08</b>  | 1 |

| Scan# | Charge | Score | pp   | pp2  | Peptide             |
|-------|--------|-------|------|------|---------------------|
| 1751  | 3      | 58    | 13.5 | 17.5 | [26-31]-s-s-[92-97] |



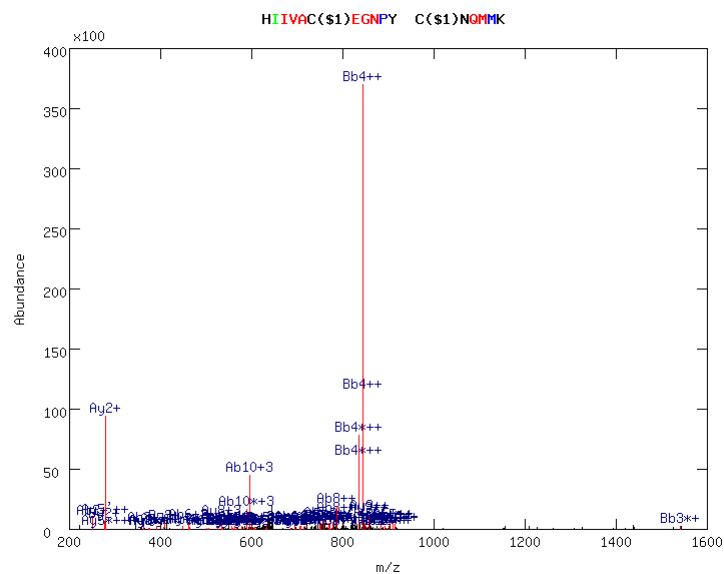

chainA :

| #  | b <sup>++3</sup> | b <sup>*+3</sup> | b <sup>+3</sup> | b <sup>++</sup> | b <sup>*+</sup> | b <sup>+</sup> | b <sup>++</sup> | b <sup>*+</sup> | b <sup>+</sup> | seq | y <sup>++3</sup> | y <sup>*+3</sup> | y <sup>+3</sup> | y <sup>++</sup> | y <sup>*+</sup> | y <sup>+</sup> | y <sup>++</sup> | y <sup>*+</sup> | y <sup>+</sup> | #  |
|----|------------------|------------------|-----------------|-----------------|-----------------|----------------|-----------------|-----------------|----------------|-----|------------------|------------------|-----------------|-----------------|-----------------|----------------|-----------------|-----------------|----------------|----|
| 1  | ---              | ---              | 46.69           | ---             | ---             | 69.54          | ---             | ---             | 138.07         | H   | 650.29           | 650.62           | 656.29          | 974.93          | 975.42          | 983.94         | 1948.85         | 1949.84         | 1966.86        | 11 |
| 2  | ---              | ---              | 84.39           | ---             | ---             | 126.08         | ---             | ---             | 251.15         | I   | 604.60           | 604.93           | 610.61          | 906.40          | 906.89          | 915.41         | 1811.80         | 1812.78         | 1829.81        | 10 |
| 3  | ---              | ---              | 122.08          | ---             | ---             | 182.62         | ---             | ---             | 364.23         | I   | 566.91           | 567.24           | 572.91          | 849.86          | 850.35          | 858.86         | 1698.71         | 1699.70         | 1716.72        | 9  |
| 4  | ---              | ---              | 155.11          | ---             | ---             | 232.16         | ---             | ---             | 463.30         | V   | 529.21           | 529.54           | 535.22          | 793.32          | 793.81          | 802.32         | 1585.63         | 1586.61         | 1603.64        | 8  |
| 5  | ---              | ---              | 178.79          | ---             | ---             | 267.67         | ---             | ---             | 534.34         | A   | 496.19           | 496.52           | 502.19          | 743.78          | 744.28          | 752.79         | 1486.56         | 1487.54         | 1504.57        | 7  |
| 6  | 457.55           | 457.87           | 463.55          | 685.81          | 686.31          | 694.82         | 1370.62         | 1371.60         | 1388.63        | C   | 472.51           | 472.84           | 478.52          | 708.26          | 708.76          | 717.27         | 1415.52         | 1416.51         | 1433.53        | 6  |
| 7  | 500.56           | 500.89           | 506.56          | 750.34          | 750.83          | 759.34         | 1499.66         | 1500.65         | 1517.67        | E   | 187.75           | 188.08           | 193.75          | 281.12          | 281.61          | 290.12         | 561.23          | 562.21          | 579.24         | 5  |
| 8  | 519.57           | 519.89           | 525.57          | 778.85          | 779.34          | 787.85         | 1556.68         | 1557.67         | 1574.70        | G   | 144.73           | 145.06           | 150.74          | 216.60          | 217.09          | 225.60         | 432.19          | 433.17          | 450.20         | 4  |
| 9  | 557.58           | 557.91           | 563.58          | 835.87          | 836.36          | 844.87         | 1670.73         | 1671.71         | 1688.74        | N   | 125.73           | 126.06           | 131.73          | 188.09          | 188.58          | 197.09         | 375.17          | 376.15          | 393.18         | 3  |
| 10 | 589.93           | 590.26           | 595.94          | 884.39          | 884.89          | 893.40         | 1767.78         | 1768.76         | 1785.79        | P   | 87.71            | ---              | 93.72           | 131.07          | ---             | 140.07         | 261.12          | ---             | 279.13         | 2  |
| 11 | ---              | ---              | ---             | ---             | ---             | ---            | ---             | ---             | ---            | Y   | 55.36            | ---              | 61.37           | 82.54           | ---             | 91.54          | 164.07          | ---             | 182.08         | 1  |

chainB :

| # | b <sup>++3</sup> | b <sup>*+3</sup> | b <sup>+3</sup> | b <sup>++</sup> | b <sup>*+</sup> | b <sup>+</sup> | b <sup>++</sup> | b <sup>*+</sup> | b <sup>+</sup> | seq | y <sup>++3</sup> | y <sup>*+3</sup> | y <sup>+3</sup> | y <sup>++</sup> | y <sup>*+</sup> | y <sup>+</sup> | y <sup>++</sup> | y <sup>*+</sup> | y <sup>+</sup> | # |
|---|------------------|------------------|-----------------|-----------------|-----------------|----------------|-----------------|-----------------|----------------|-----|------------------|------------------|-----------------|-----------------|-----------------|----------------|-----------------|-----------------|----------------|---|
| 1 | ---              | 433.86           | 439.53          | ---             | 650.28          | 658.79         | ---             | 1299.55         | 1316.58        | C   | ---              | ---              | ---             | ---             | ---             | ---            | ---             | ---             | ---            | 6 |
| 2 | ---              | 471.87           | 477.55          | ---             | 707.30          | 715.81         | ---             | 1413.59         | 1430.62        | N   | 211.77           | 212.09           | 217.77          | 317.15          | 317.64          | 326.15         | 633.29          | 634.27          | 651.30         | 5 |
| 3 | ---              | 514.56           | 520.23          | ---             | 771.33          | 779.84         | ---             | 1541.65         | 1558.68        | Q   | 173.75           | 174.08           | 179.76          | 260.13          | 260.62          | 269.13         | 519.24          | 520.23          | 537.25         | 4 |
| 4 | ---              | 558.24           | 563.91          | ---             | 836.85          | 845.36         | ---             | 1672.69         | 1689.72        | M   | 131.07           | 131.39           | 137.07          | 196.10          | 196.59          | 205.10         | 391.18          | 392.17          | 409.19         | 3 |
| 5 | ---              | 601.92           | 607.59          | ---             | 902.37          | 910.88         | ---             | 1803.73         | 1820.76        | M   | 87.39            | 87.71            | 93.39           | 130.58          | 131.07          | 139.58         | 260.14          | 261.13          | 278.15         | 2 |
| 6 | ---              | ---              | ---             | ---             | ---             | ---            | ---             | ---             | ---            | K   | 43.71            | 44.03            | 49.71           | 65.06           | 65.55           | 74.06          | 129.10          | 130.09          | 147.11         | 1 |

| Scan# | Charge | Score | pp  | pp2  | Peptide               |
|-------|--------|-------|-----|------|-----------------------|
| 2000  | 3      | 34    | 6.3 | 14.2 | [26-31]-s-s-[105-115] |



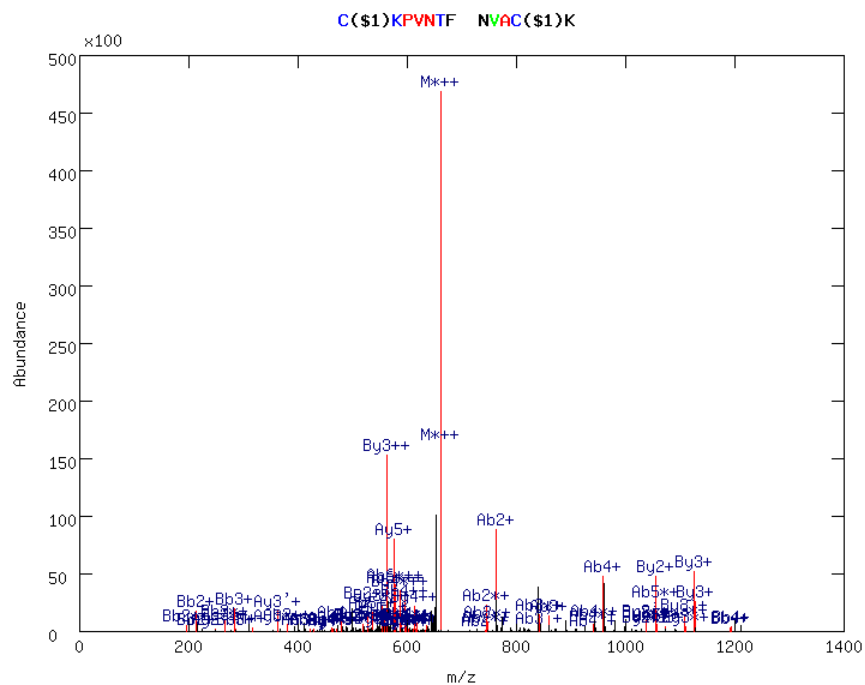

chainA :

| # | b <sup>+++</sup> | b <sup>+++</sup> | b <sup>++</sup> | b <sup>++</sup> | b <sup>++</sup> | b <sup>+</sup> | seq | y <sup>+++</sup> | y <sup>+++</sup> | y <sup>++</sup> | y <sup>++</sup> | y <sup>++</sup> | y <sup>+</sup> | # |
|---|------------------|------------------|-----------------|-----------------|-----------------|----------------|-----|------------------|------------------|-----------------|-----------------|-----------------|----------------|---|
| 1 | 309.13           | 309.62           | <b>318.14</b>   | <b>617.25</b>   | <b>618.24</b>   | <b>635.26</b>  | C   | <b>661.32</b>    | <b>661.82</b>    | 670.33          | 1321.64         | 1322.62         | 1339.65        | 7 |
| 2 | 373.18           | 373.67           | <b>382.18</b>   | <b>745.35</b>   | <b>746.33</b>   | <b>763.36</b>  | K   | 344.20           | 344.69           | 353.20          | 687.38          | 688.37          | 705.39         | 6 |
| 3 | <b>421.70</b>    | <b>422.20</b>    | <b>430.71</b>   | <b>842.40</b>   | <b>843.39</b>   | <b>860.41</b>  | P   | 280.15           | 280.64           | 289.15          | <b>559.29</b>   | <b>560.27</b>   | <b>577.30</b>  | 5 |
| 4 | <b>471.24</b>    | <b>471.73</b>    | <b>480.24</b>   | <b>941.47</b>   | <b>942.45</b>   | <b>959.48</b>  | V   | 231.62           | 232.11           | 240.63          | <b>462.24</b>   | <b>463.22</b>   | <b>480.25</b>  | 4 |
| 5 | <b>528.26</b>    | <b>528.75</b>    | <b>537.27</b>   | <b>1055.51</b>  | <b>1056.50</b>  | <b>1073.52</b> | N   | 182.09           | 182.58           | 191.09          | <b>363.17</b>   | <b>364.15</b>   | <b>381.18</b>  | 3 |
| 6 | <b>578.78</b>    | <b>579.28</b>    | <b>587.79</b>   | 1156.56         | 1157.54         | 1174.57        | T   | 125.07           | —                | 134.07          | <b>249.12</b>   | —               | <b>267.13</b>  | 2 |
| 7 | —                | —                | —               | —               | —               | —              | F   | 74.54            | —                | 83.55           | 148.08          | —               | 166.09         | 1 |

chainB :

| # | b <sup>+++</sup> | b <sup>+++</sup> | b <sup>++</sup> | b <sup>+</sup> | b <sup>++</sup> | b <sup>+</sup> | seq | y <sup>+++</sup> | y <sup>+++</sup> | y <sup>++</sup> | y <sup>++</sup> | y <sup>++</sup> | y <sup>+</sup> | # |
|---|------------------|------------------|-----------------|----------------|-----------------|----------------|-----|------------------|------------------|-----------------|-----------------|-----------------|----------------|---|
| 1 | —                | 49.52            | 58.03           | —              | 98.02           | 115.05         | N   | —                | —                | —               | —               | —               | —              | 5 |
| 2 | —                | 99.05            | 107.56          | —              | <b>197.09</b>   | <b>214.12</b>  | V   | <b>604.30</b>    | <b>604.79</b>    | <b>613.31</b>   | 1207.60         | 1208.58         | 1225.61        | 4 |
| 3 | —                | 134.57           | 143.08          | —              | <b>268.13</b>   | <b>285.16</b>  | A   | <b>554.77</b>    | <b>555.26</b>    | <b>563.77</b>   | <b>1108.53</b>  | <b>1109.51</b>  | <b>1126.54</b> | 3 |
| 4 | —                | <b>588.76</b>    | <b>597.28</b>   | —              | 1176.52         | <b>1193.54</b> | C   | <b>519.25</b>    | <b>519.74</b>    | <b>528.25</b>   | <b>1037.49</b>  | <b>1038.48</b>  | <b>1055.50</b> | 2 |
| 5 | —                | —                | —               | —              | —               | —              | K   | 65.06            | 65.55            | 74.06           | 129.10          | 130.09          | 147.11         | 1 |

| Scan# | Charge | Score | pp   | pp2  | Peptide             |
|-------|--------|-------|------|------|---------------------|
| 1270  | 2      | 45    | 18.5 | 41.2 | [40-46]-s-s-[62-66] |

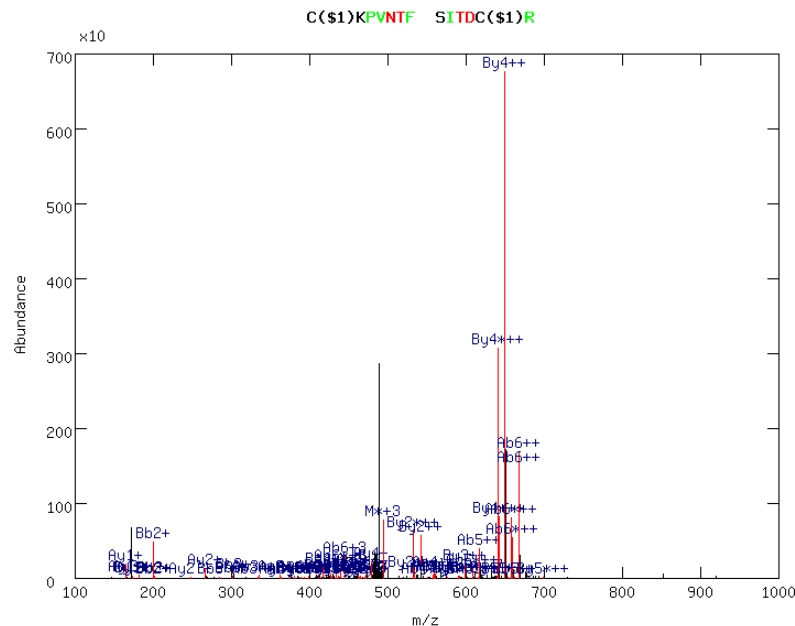

chainA :

| # | b <sup>++3</sup> | b <sup>+++</sup> | b <sup>+3</sup> | b <sup>++</sup> | b <sup>+++</sup> | b <sup>++</sup> | b <sup>+</sup> | b <sup>++</sup> | b <sup>+</sup> | seq | y <sup>++3</sup> | y <sup>+++</sup> | y <sup>+3</sup> | y <sup>++</sup> | y <sup>+++</sup> | y <sup>++</sup> | y <sup>+</sup> | y <sup>++</sup> | y <sup>+</sup> | # |
|---|------------------|------------------|-----------------|-----------------|------------------|-----------------|----------------|-----------------|----------------|-----|------------------|------------------|-----------------|-----------------|------------------|-----------------|----------------|-----------------|----------------|---|
| 1 | 259.77           | 260.10           | 265.78          | <b>389.16</b>   | <b>389.65</b>    | 398.16          | 777.30         | 778.29          | 795.31         | C   | <b>494.57</b>    | <b>494.90</b>    | 500.57          | 741.35          | 741.84           | 750.35          | 1481.69        | 1482.67         | 1499.70        | 7 |
| 2 | <b>302.47</b>    | <b>302.80</b>    | 308.47          | 453.20          | 453.69           | <b>462.21</b>   | 905.40         | 906.38          | 923.41         | K   | 229.80           | 230.13           | 235.80          | 344.20          | 344.69           | 353.20          | 687.38         | 688.37          | 705.39         | 6 |
| 3 | <b>334.82</b>    | <b>335.15</b>    | 340.83          | 501.73          | 502.22           | 510.73          | 1002.45        | 1003.43         | 1020.46        | P   | 187.10           | 187.43           | 193.10          | 280.15          | 280.64           | 289.15          | <b>559.29</b>  | <b>560.27</b>   | <b>577.30</b>  | 5 |
| 4 | 367.84           | 368.17           | <b>373.85</b>   | <b>551.26</b>   | <b>551.76</b>    | <b>560.27</b>   | 1101.52        | 1102.50         | 1119.53        | V   | 154.75           | 155.08           | 160.75          | 231.62          | 232.11           | 240.63          | <b>462.24</b>  | <b>463.22</b>   | <b>480.25</b>  | 4 |
| 5 | 405.86           | 406.19           | <b>411.86</b>   | <b>608.28</b>   | <b>608.78</b>    | <b>617.29</b>   | 1215.56        | 1216.55         | 1233.57        | N   | 121.73           | 122.06           | 127.73          | <b>182.09</b>   | <b>182.58</b>    | 191.09          | <b>363.17</b>  | <b>364.15</b>   | <b>381.18</b>  | 3 |
| 6 | <b>439.54</b>    | <b>439.87</b>    | <b>445.55</b>   | <b>658.81</b>   | <b>659.30</b>    | <b>667.81</b>   | 1316.61        | 1317.59         | 1334.62        | T   | 83.71            | —                | 89.72           | 125.07          | —                | 134.07          | <b>249.12</b>  | —               | <b>267.13</b>  | 2 |
| 7 | —                | —                | —               | —               | —                | —               | —              | —               | —              | F   | 50.03            | —                | 56.03           | 74.54           | —                | 83.55           | 148.08         | —               | <b>166.09</b>  | 1 |

chainB :

| # | b <sup>++3</sup> | b <sup>+++</sup> | b <sup>+3</sup> | b <sup>++</sup> | b <sup>+++</sup> | b <sup>++</sup> | b <sup>+</sup> | b <sup>++</sup> | b <sup>+</sup> | seq | y <sup>++3</sup> | y <sup>+++</sup> | y <sup>+3</sup> | y <sup>++</sup> | y <sup>+++</sup> | y <sup>++</sup> | y <sup>+</sup> | y <sup>++</sup> | y <sup>+</sup> | # |
|---|------------------|------------------|-----------------|-----------------|------------------|-----------------|----------------|-----------------|----------------|-----|------------------|------------------|-----------------|-----------------|------------------|-----------------|----------------|-----------------|----------------|---|
| 1 | 24.01            | —                | 30.02           | 35.52           | —                | 44.52           | 70.03          | —               | 88.04          | S   | —                | —                | —               | —               | —                | —               | —              | —               | —              | 6 |
| 2 | 61.71            | —                | 67.71           | 92.06           | —                | 101.07          | 183.11         | —               | <b>201.12</b>  | I   | <b>465.56</b>    | <b>465.89</b>    | <b>471.56</b>   | 697.83          | <b>698.32</b>    | 706.84          | 1394.66        | 1395.64         | 1412.67        | 5 |
| 3 | 95.39            | —                | 101.40          | 142.58          | —                | 151.59          | <b>284.16</b>  | —               | <b>302.17</b>  | T   | <b>427.86</b>    | <b>428.19</b>    | <b>433.87</b>   | <b>641.29</b>   | <b>641.78</b>    | <b>650.30</b>   | 1281.57        | 1282.56         | 1299.58        | 4 |
| 4 | 133.73           | —                | 139.74          | <b>200.10</b>   | —                | 209.10          | <b>399.19</b>  | —               | <b>417.20</b>  | D   | <b>394.18</b>    | <b>394.51</b>    | 400.18          | <b>590.77</b>   | <b>591.26</b>    | <b>599.77</b>   | 1180.52        | 1181.51         | 1198.53        | 3 |
| 5 | <b>436.53</b>    | <b>436.86</b>    | 442.53          | <b>654.29</b>   | <b>654.78</b>    | <b>663.30</b>   | 1307.58        | 1308.56         | 1325.59        | C   | 355.84           | 356.17           | 361.84          | <b>533.25</b>   | <b>533.74</b>    | <b>542.26</b>   | 1065.50        | 1066.48         | 1083.51        | 2 |
| 6 | —                | —                | —               | —               | —                | —               | —              | —               | —              | R   | 53.04            | 53.37            | 59.05           | 79.06           | 79.55            | 88.06           | 157.11         | 158.09          | <b>175.12</b>  | 1 |

| Scan# | Charge | Score | pp   | pp2 | Peptide             |
|-------|--------|-------|------|-----|---------------------|
| 1742  | 3      | 35    | 11.7 | 9.2 | [40-46]-s-s-[80-85] |

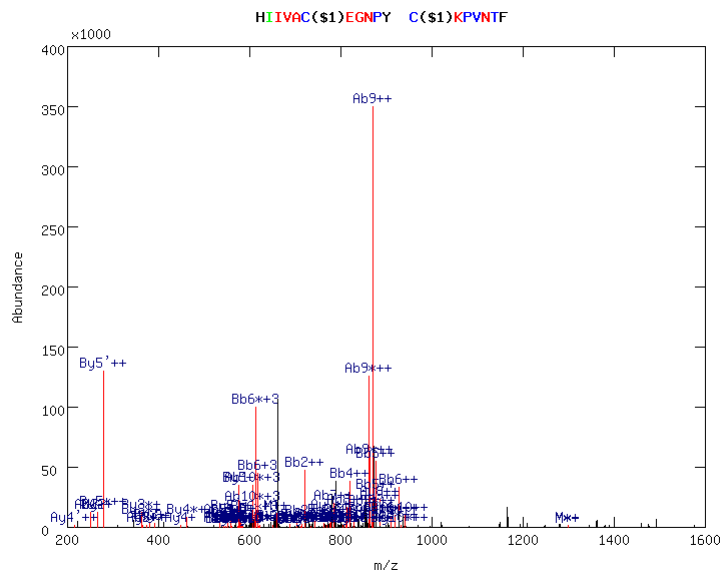

chainA :

| #  | b <sup>++3</sup> | b <sup>++3</sup> | b <sup>+3</sup> | b <sup>++</sup> | b <sup>+</sup> | seq | y <sup>++3</sup> | y <sup>++3</sup> | y <sup>+3</sup> | y <sup>++</sup> | y <sup>+</sup> | #  |
|----|------------------|------------------|-----------------|-----------------|-----------------|-----------------|-----------------|-----------------|----------------|-----|------------------|------------------|-----------------|-----------------|-----------------|-----------------|-----------------|-----------------|----------------|----|
| 1  |                  |                  | 46.69           |                 |                 | 69.54           |                 |                 | 138.07         | H   | 668.32           | 668.65           | 674.33          | 1001.98         | 1002.47         | 1010.99         | 2002.95         | 2003.94         | 2020.96        | 11 |
| 2  |                  |                  | 84.39           |                 |                 | 126.08          |                 |                 | 251.15         | I   | 622.64           | 622.96           | 628.64          | 933.45          | 933.94          | 942.46          | 1865.89         | 1866.88         | 1883.90        | 10 |
| 3  |                  |                  | 122.08          |                 |                 | 182.62          |                 |                 | 364.23         | I   | 584.94           | 585.27           | 590.95          | 876.91          | 877.40          | 885.91          | 1752.81         | 1753.79         | 1770.82        | 9  |
| 4  |                  |                  | 155.11          |                 |                 | 232.16          |                 |                 | 463.30         | V   | 547.25           | 547.57           | 553.25          | 820.37          | 820.86          | 829.37          | 1639.72         | 1640.71         | 1657.74        | 8  |
| 5  |                  |                  | 178.79          |                 |                 | 267.67          |                 |                 | 534.34         | A   | 514.22           | 514.55           | 520.23          | 770.83          | 771.32          | 779.84          | 1540.66         | 1541.64         | 1558.67        | 7  |
| 6  | 475.58           | 475.91           | 481.58          | 712.86          | 713.36          | 721.87          | 1424.72         | 1425.70         | 1442.73        | C   | 490.54           | 490.87           | 496.55          | 735.31          | 735.81          | 744.32          | 1469.62         | 1470.60         | 1487.63        | 6  |
| 7  | 518.59           | 518.92           | 524.60          | 777.38          | 777.88          | 786.39          | 1553.76         | 1554.74         | 1571.77        | E   | 187.75           | 188.08           | 193.75          | 281.12          | 281.61          | 290.12          | 561.23          | 562.21          | 579.24         | 5  |
| 8  | 537.60           | 537.93           | 543.60          | 805.90          | 806.39          | 814.90          | 1610.78         | 1611.77         | 1628.79        | G   | 144.73           | 145.06           | 150.74          | 216.60          | 217.09          | 225.60          | 432.19          | 433.17          | 450.20         | 4  |
| 9  | 575.61           | 575.94           | 581.62          | 862.92          | 863.41          | 871.92          | 1724.83         | 1725.81         | 1742.84        | N   | 125.73           | 126.06           | 131.73          | 188.09          | 188.58          | 197.09          | 375.17          | 376.15          | 393.18         | 3  |
| 10 | 607.96           | 608.29           | 613.97          | 911.44          | 911.93          | 920.45          | 1821.88         | 1822.86         | 1839.89        | P   | 87.71            |                  | 93.72           | 131.07          |                 | 140.07          | 261.12          |                 | 279.13         | 2  |
| 11 |                  |                  |                 |                 |                 |                 |                 |                 |                | Y   | 55.36            |                  | 61.37           | 82.54           |                 | 91.54           | 164.07          |                 | 182.08         | 1  |

chainB :

| # | b <sup>++3</sup> | b <sup>++3</sup> | b <sup>+3</sup> | b <sup>++</sup> | b <sup>+</sup> | seq | y <sup>++3</sup> | y <sup>++3</sup> | y <sup>+3</sup> | y <sup>++</sup> | y <sup>+</sup> | # |
|---|------------------|------------------|-----------------|-----------------|-----------------|-----------------|-----------------|-----------------|----------------|-----|------------------|------------------|-----------------|-----------------|-----------------|-----------------|-----------------|-----------------|----------------|---|
| 1 | 433.53           | 433.86           | 439.53          | 649.79          | 650.28          | 658.79          | 1298.57         | 1299.55         | 1316.58        | C   |                  |                  |                 |                 |                 |                 |                 |                 |                | 7 |
| 2 | 476.23           | 476.55           | 482.23          | 713.83          | 714.33          | 722.84          | 1426.66         | 1427.65         | 1444.67        | K   | 229.80           | 230.13           | 235.80          | 344.20          | 344.69          | 353.20          | 687.38          | 688.37          | 705.39         | 6 |
| 3 | 508.58           | 508.90           | 514.58          | 762.36          | 762.85          | 771.37          | 1523.71         | 1524.70         | 1541.72        | P   | 187.10           | 187.43           | 193.10          | 280.15          | 280.64          | 289.15          | 559.29          | 560.27          | 577.30         | 5 |
| 4 | 541.60           | 541.93           | 547.60          | 811.90          | 812.39          | 820.90          | 1622.78         | 1623.77         | 1640.79        | V   | 154.75           | 155.08           | 160.75          | 231.62          | 232.11          | 240.63          | 462.24          | 463.22          | 480.25         | 4 |
| 5 | 579.61           | 579.94           | 585.62          | 868.92          | 869.41          | 877.92          | 1736.83         | 1737.81         | 1754.84        | N   | 121.73           | 122.06           | 127.73          | 182.09          | 182.58          | 191.09          | 363.17          | 364.15          | 381.18         | 3 |
| 6 | 613.30           | 613.62           | 619.30          | 919.44          | 919.93          | 928.45          | 1837.87         | 1838.86         | 1855.88        | T   | 83.71            |                  | 89.72           | 125.07          |                 | 134.07          | 249.12          |                 | 267.13         | 2 |
| 7 |                  |                  |                 |                 |                 |                 |                 |                 |                | F   | 50.03            |                  | 56.03           | 74.54           |                 | 83.55           | 148.08          |                 | 166.09         | 1 |

| Scan# | Charge | Score | pp  | pp2  | Peptide               |
|-------|--------|-------|-----|------|-----------------------|
| 2113  | 3      | 44    | 6.3 | 10.7 | [40-46]-s-s-[105-115] |

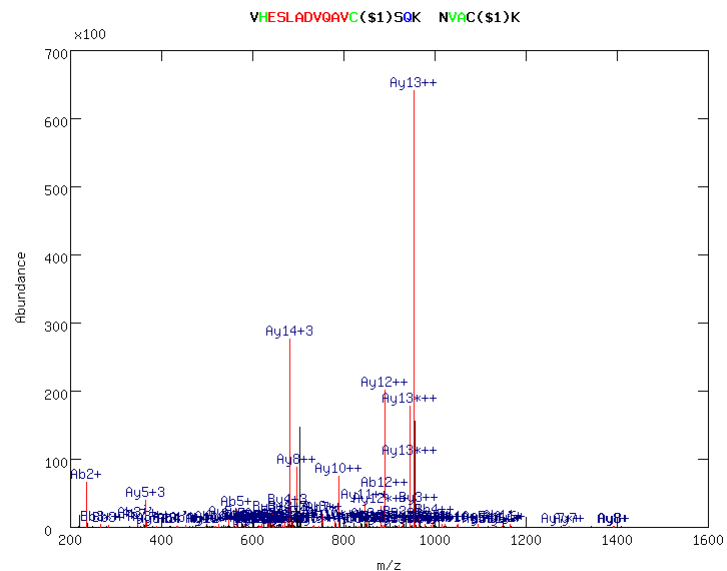

chainA :

| #  | b <sup>++3</sup> | b <sup>++2</sup> | b <sup>++1</sup> | b <sup>++0</sup> | b <sup>++-1</sup> | b <sup>++-2</sup> | b <sup>++-3</sup> | b <sup>++-4</sup> | b <sup>++-5</sup> | seq | y <sup>++3</sup> | y <sup>++2</sup> | y <sup>++1</sup> | y <sup>++0</sup> | y <sup>++-1</sup> | y <sup>++-2</sup> | y <sup>++-3</sup> | y <sup>++-4</sup> | y <sup>++-5</sup> | #  |
|----|------------------|------------------|------------------|------------------|-------------------|-------------------|-------------------|-------------------|-------------------|-----|------------------|------------------|------------------|------------------|-------------------|-------------------|-------------------|-------------------|-------------------|----|
| 1  |                  |                  | 34.03            |                  |                   | 50.54             |                   |                   | 100.08            | V   | 709.68           | 710.01           | 715.69           | 1064.02          | 1064.51           | 1073.03           | 2127.03           | 2128.02           | 2145.04           | 15 |
| 2  |                  |                  | 79.72            |                  |                   | 119.07            |                   |                   | 237.14            | H   | 676.66           | 676.99           | 682.66           | 1014.49          | 1014.98           | 1023.49           | 2027.96           | 2028.95           | 2045.97           | 14 |
| 3  | 116.73           |                  | 122.73           | 174.59           |                   | 183.59            | 348.17            |                   | 366.18            | E   | 630.97           | 631.30           | 636.98           | 945.96           | 946.45            | 954.96            | 1890.91           | 1891.89           | 1908.92           | 13 |
| 4  | 145.74           |                  | 151.74           | 218.10           |                   | 227.11            | 435.20            |                   | 453.21            | S   | 587.96           | 588.29           | 593.96           | 881.44           | 881.93            | 890.44            | 1761.86           | 1762.85           | 1779.87           | 12 |
| 5  | 183.43           |                  | 189.44           | 274.65           |                   | 283.65            | 548.28            |                   | 566.29            | L   | 558.95           | 559.28           | 564.95           | 837.92           | 838.41            | 846.92            | 1674.83           | 1675.81           | 1692.84           | 11 |
| 6  | 207.11           |                  | 213.12           | 310.16           |                   | 319.17            | 619.32            |                   | 637.33            | A   | 521.25           | 521.58           | 527.26           | 781.38           | 781.87            | 790.38            | 1561.75           | 1562.73           | 1579.76           | 10 |
| 7  | 245.45           |                  | 251.46           | 367.68           |                   | 376.68            | 734.35            |                   | 752.36            | D   | 497.58           | 497.90           | 503.58           | 745.86           | 746.35            | 754.86            | 1490.71           | 1491.69           | 1508.72           | 9  |
| 8  | 278.48           |                  | 284.48           | 417.21           |                   | 426.22            | 833.42            |                   | 851.43            | V   | 459.23           | 459.56           | 465.24           | 688.35           | 688.84            | 697.35            | 1375.68           | 1376.67           | 1393.69           | 8  |
| 9  | 321.16           | 321.49           | 327.17           | 481.24           | 481.73            | 490.25            | 961.47            | 962.46            | 979.48            | Q   | 426.21           | 426.54           | 432.21           | 638.81           | 639.30            | 647.82            | 1276.61           | 1277.60           | 1294.62           | 7  |
| 10 | 344.84           | 345.17           | 350.85           | 516.76           | 517.25            | 525.76            | 1032.51           | 1033.50           | 1050.52           | A   | 383.52           | 383.85           | 389.53           | 574.78           | 575.27            | 583.79            | 1148.56           | 1149.54           | 1166.57           | 6  |
| 11 | 377.87           | 378.19           | 383.87           | 566.29           | 566.79            | 575.30            | 1131.58           | 1132.56           | 1149.59           | V   | 359.84           | 360.17           | 365.85           | 539.26           | 539.76            | 548.27            | 1077.52           | 1078.50           | 1095.53           | 5  |
| 12 | 589.28           | 589.61           | 595.29           | 883.42           | 883.91            | 892.43            | 1765.84           | 1766.82           | 1783.85           | C   | 326.82           | 327.15           | 332.83           | 489.73           | 490.22            | 498.73            | 978.45            | 979.43            | 996.46            | 4  |
| 13 | 618.29           | 618.62           | 624.30           | 926.94           | 927.43            | 935.94            | 1852.87           | 1853.85           | 1870.88           | S   | 115.40           | 115.73           | 121.41           | 172.60           | 173.09            | 181.61            | 344.19            | 345.18            | 362.20            | 3  |
| 14 | 660.98           | 661.31           | 666.98           | 990.97           | 991.46            | 999.97            | 1980.93           | 1981.91           | 1998.94           | Q   | 86.39            | 86.72            | 92.40            | 129.08           | 129.58            | 138.09            | 257.16            | 258.15            | 275.17            | 2  |
| 15 |                  |                  |                  |                  |                   |                   |                   |                   |                   | K   | 43.71            | 44.03            | 49.71            | 65.06            | 65.55             | 74.06             | 129.10            | 130.09            | 147.11            | 1  |

chainB :

| # | b <sup>++3</sup> | b <sup>++2</sup> | b <sup>++1</sup> | b <sup>++0</sup> | b <sup>++-1</sup> | b <sup>++-2</sup> | b <sup>++-3</sup> | b <sup>++-4</sup> | b <sup>++-5</sup> | seq | y <sup>++3</sup> | y <sup>++2</sup> | y <sup>++1</sup> | y <sup>++0</sup> | y <sup>++-1</sup> | y <sup>++-2</sup> | y <sup>++-3</sup> | y <sup>++-4</sup> | y <sup>++-5</sup> | # |
|---|------------------|------------------|------------------|------------------|-------------------|-------------------|-------------------|-------------------|-------------------|-----|------------------|------------------|------------------|------------------|-------------------|-------------------|-------------------|-------------------|-------------------|---|
| 1 |                  | 33.35            | 39.02            |                  | 49.52             | 58.03             |                   | 98.02             | 115.05            | N   |                  |                  |                  |                  |                   |                   |                   |                   |                   | 5 |
| 2 |                  | 66.37            | 72.04            |                  | 99.05             | 107.56            |                   | 197.09            | 214.12            | V   | 671.67           | 672.00           | 677.67           | 1007.00          | 1007.49           | 1016.00           | 2012.99           | 2013.97           | 2031.00           | 4 |
| 3 |                  | 90.05            | 95.72            |                  | 134.57            | 143.08            |                   | 268.13            | 285.16            | A   | 638.65           | 638.97           | 644.65           | 957.46           | 957.96            | 966.47            | 1913.92           | 1914.91           | 1931.93           | 3 |
| 4 |                  | 661.31           | 666.98           |                  | 991.46            | 999.97            |                   | 1981.91           | 1998.94           | C   | 614.97           | 615.29           | 620.97           | 921.95           | 922.44            | 930.95            | 1842.88           | 1843.87           | 1860.89           | 2 |
| 5 |                  |                  |                  |                  |                   |                   |                   |                   |                   | K   | 43.71            | 44.03            | 49.71            | 65.06            | 65.55             | 74.06             | 129.10            | 130.09            | 147.11            | 1 |

| Scan# | Charge | Score | pp  | pp2 | Peptide             |
|-------|--------|-------|-----|-----|---------------------|
| 1864  | 3      | 38    | 5.2 | 8.2 | [47-61]-s-s-[62-66] |

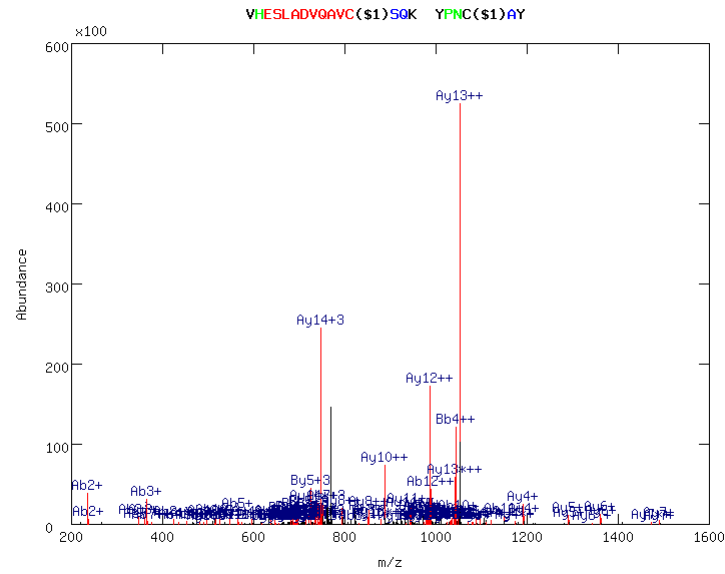

chainA :

| #  | b <sup>++3</sup> | seq | y <sup>++3</sup> | #  |
|----|------------------|------------------|------------------|------------------|------------------|------------------|------------------|------------------|------------------|-----|------------------|------------------|------------------|------------------|------------------|------------------|------------------|------------------|------------------|----|
| 1  | -                | -                | 34.03            | -                | -                | 50.54            | -                | -                | 100.08           | V   | 775.02           | 775.35           | 781.02           | 1162.03          | 1162.52          | 1171.03          | 2323.05          | 2324.03          | 2341.06          | 15 |
| 2  | -                | -                | 79.72            | -                | -                | 119.07           | -                | -                | 237.14           | H   | 742.00           | 742.33           | 748.00           | 1112.49          | 1112.99          | 1121.50          | 2223.98          | 2224.96          | 2241.99          | 14 |
| 3  | 116.73           | -                | 122.73           | 174.59           | -                | 183.59           | 348.17           | -                | 366.18           | E   | 696.31           | 696.64           | 702.32           | 1043.96          | 1044.46          | 1052.97          | 2086.92          | 2087.91          | 2104.93          | 13 |
| 4  | 145.74           | -                | 151.74           | 218.10           | -                | 227.11           | 435.20           | -                | 453.21           | S   | 653.30           | 653.63           | 659.30           | 979.44           | 979.94           | 988.45           | 1957.88          | 1958.86          | 1975.89          | 12 |
| 5  | 183.43           | -                | 189.44           | 274.65           | -                | 283.65           | 548.28           | -                | 566.29           | L   | 624.29           | 624.62           | 630.29           | 935.93           | 936.42           | 944.93           | 1870.85          | 1871.83          | 1888.86          | 11 |
| 6  | 207.11           | -                | 213.12           | 310.16           | -                | 319.17           | 619.32           | -                | 637.33           | A   | 586.59           | 586.92           | 592.60           | 879.39           | 879.88           | 888.39           | 1757.76          | 1758.75          | 1775.77          | 10 |
| 7  | 245.45           | -                | 251.46           | 367.68           | -                | 376.68           | 734.35           | -                | 752.36           | D   | 562.91           | 563.24           | 568.92           | 843.87           | 844.36           | 852.87           | 1686.73          | 1687.71          | 1704.74          | 9  |
| 8  | 278.48           | -                | 284.48           | 417.21           | -                | 426.22           | 833.42           | -                | 851.43           | V   | 524.57           | 524.90           | 530.57           | 786.35           | 786.85           | 795.36           | 1571.70          | 1572.68          | 1589.71          | 8  |
| 9  | 321.16           | 321.49           | 327.17           | 481.24           | 481.73           | 490.25           | 961.47           | 962.46           | 979.48           | Q   | 491.55           | 491.88           | 497.55           | 736.82           | 737.31           | 745.82           | 1472.63          | 1473.61          | 1490.64          | 7  |
| 10 | 344.84           | 345.17           | 350.85           | 516.76           | 517.25           | 525.76           | 1032.51          | 1033.50          | 1050.52          | A   | 448.86           | 449.19           | 454.87           | 672.79           | 673.28           | 681.80           | 1344.57          | 1345.56          | 1362.58          | 6  |
| 11 | 377.87           | 378.19           | 383.87           | 566.29           | 566.79           | 575.30           | 1131.58          | 1132.56          | 1149.59          | V   | 425.18           | 425.51           | 431.19           | 637.27           | 637.76           | 646.28           | 1273.53          | 1274.52          | 1291.55          | 5  |
| 12 | 654.62           | 654.95           | 660.63           | 981.43           | 981.92           | 990.44           | 1961.85          | 1962.84          | 1979.86          | C   | 392.16           | 392.49           | 398.16           | 587.74           | 588.23           | 596.74           | 1174.47          | 1175.45          | 1192.48          | 4  |
| 13 | 683.63           | 683.96           | 689.64           | 1024.95          | 1025.44          | 1033.95          | 2048.88          | 2049.87          | 2066.90          | S   | 115.40           | 115.73           | 121.41           | 172.60           | 173.09           | 181.61           | 344.19           | 345.18           | 362.20           | 3  |
| 14 | 726.32           | 726.65           | 732.32           | 1088.98          | 1089.47          | 1097.98          | 2176.94          | 2177.93          | 2194.95          | Q   | 86.39            | 86.72            | 92.40            | 129.08           | 129.58           | 138.09           | 257.16           | 258.15           | 275.17           | 2  |
| 15 | -                | -                | -                | -                | -                | -                | -                | -                | -                | K   | 43.71            | 44.03            | 49.71            | 65.06            | 65.55            | 74.06            | 129.10           | 130.09           | 147.11           | 1  |

chainB :

| # | b <sup>++3</sup> | seq | y <sup>++3</sup> | # |
|---|------------------|------------------|------------------|------------------|------------------|------------------|------------------|------------------|------------------|-----|------------------|------------------|------------------|------------------|------------------|------------------|------------------|------------------|------------------|---|
| 1 | -                | -                | 55.36            | -                | -                | 82.54            | -                | -                | 164.07           | Y   | -                | -                | -                | -                | -                | -                | -                | -                | -                | 6 |
| 2 | -                | -                | 87.71            | -                | -                | 131.07           | -                | -                | 261.12           | P   | 720.67           | 721.00           | 726.67           | 1080.50          | 1080.99          | 1089.50          | 2159.99          | 2160.97          | 2178.00          | 5 |
| 3 | -                | 120.05           | 125.73           | -                | 179.57           | 188.09           | -                | 358.14           | 375.17           | N   | 688.32           | 688.64           | 694.32           | 1031.97          | 1032.46          | 1040.98          | 2062.93          | 2063.92          | 2080.94          | 4 |
| 4 | -                | 691.31           | 696.99           | -                | 1036.46          | 1044.98          | -                | 2071.92          | 2088.95          | C   | 650.30           | 650.63           | 656.31           | 974.95           | 975.44           | 983.95           | 1948.89          | 1949.87          | 1966.90          | 3 |
| 5 | -                | 714.99           | 720.67           | -                | 1071.98          | 1080.50          | -                | 2142.96          | 2159.99          | A   | 79.04            | -                | 85.04            | 118.06           | -                | 127.06           | 235.11           | -                | 253.12           | 2 |
| 6 | -                | -                | -                | -                | -                | -                | -                | -                | -                | Y   | 55.36            | -                | 61.37            | 82.54            | -                | 91.54            | 164.07           | -                | 182.08           | 1 |

| Scan# | Charge | Score | pp   | pp2  | Peptide             |
|-------|--------|-------|------|------|---------------------|
| 2118  | 3      | 45    | 13.7 | 19.3 | [47-61]-s-s-[92-97] |

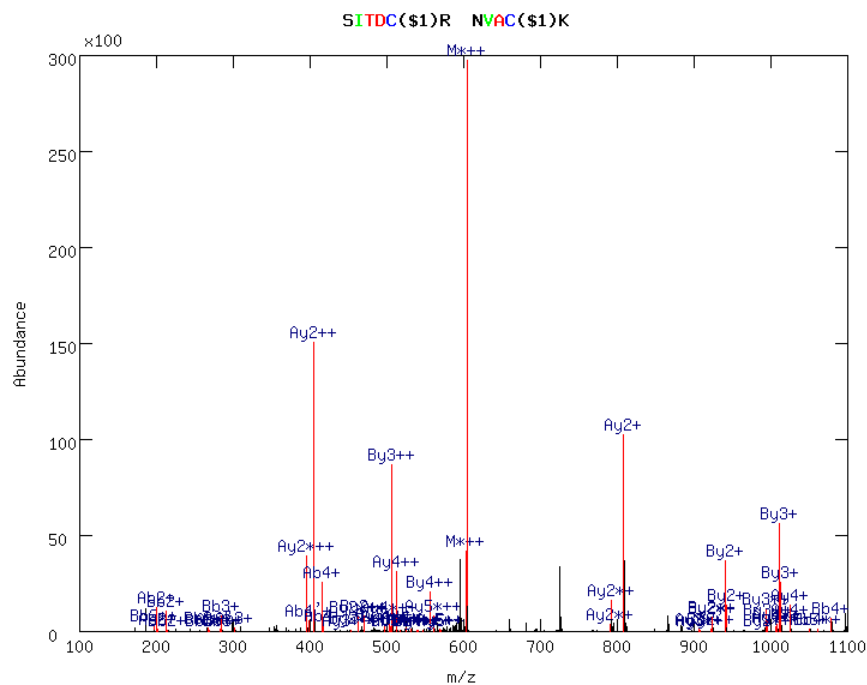

chainA :

| # | b <sup>+++</sup> | b <sup>+++</sup> | b <sup>++</sup> | b <sup>+</sup> | b <sup>++</sup> | b <sup>+</sup> | seq | y <sup>+++</sup> | y <sup>+++</sup> | y <sup>++</sup> | y <sup>+</sup> | y <sup>++</sup> | y <sup>+</sup> | # |
|---|------------------|------------------|-----------------|----------------|-----------------|----------------|-----|------------------|------------------|-----------------|----------------|-----------------|----------------|---|
| 1 | 35.52            | —                | 44.52           | 70.03          | —               | 88.04          | S   | 604.28           | 604.77           | 613.29          | 1207.56        | 1208.54         | 1225.57        | 6 |
| 2 | 92.06            | —                | 101.07          | 183.11         | —               | 201.12         | I   | 560.77           | 561.26           | 569.77          | 1120.52        | 1121.51         | 1138.53        | 5 |
| 3 | 142.58           | —                | 151.59          | 284.16         | —               | 302.17         | T   | 504.22           | 504.72           | 513.23          | 1007.44        | 1008.42         | 1025.45        | 4 |
| 4 | 200.10           | —                | 209.10          | 399.19         | —               | 417.20         | D   | 453.70           | 454.19           | 462.71          | 906.39         | 907.38          | 924.40         | 3 |
| 5 | 517.23           | 517.72           | 526.23          | 1033.44        | 1034.43         | 1051.46        | C   | 396.19           | 396.68           | 405.19          | 791.37         | 792.35          | 809.38         | 2 |
| 6 | —                | —                | —               | —              | —               | —              | R   | 79.06            | 79.55            | 88.06           | 157.11         | 158.09          | 175.12         | 1 |

chainB :

| # | b <sup>+++</sup> | b <sup>+++</sup> | b <sup>++</sup> | b <sup>+</sup> | b <sup>++</sup> | b <sup>+</sup> | seq | y <sup>+++</sup> | y <sup>+++</sup> | y <sup>++</sup> | y <sup>+</sup> | y <sup>++</sup> | y <sup>+</sup> | # |
|---|------------------|------------------|-----------------|----------------|-----------------|----------------|-----|------------------|------------------|-----------------|----------------|-----------------|----------------|---|
| 1 | —                | 49.52            | 58.03           | —              | 98.02           | 115.05         | N   | —                | —                | —               | —              | —               | —              | 5 |
| 2 | —                | 99.05            | 107.56          | —              | 197.09          | 214.12         | V   | 547.26           | 547.75           | 556.27          | 1093.51        | 1094.50         | 1111.52        | 4 |
| 3 | —                | 134.57           | 143.08          | —              | 268.13          | 285.16         | A   | 497.73           | 498.22           | 506.73          | 994.45         | 995.43          | 1012.46        | 3 |
| 4 | —                | 531.72           | 540.23          | —              | 1062.43         | 1079.46        | C   | 462.21           | 462.70           | 471.21          | 923.41         | 924.39          | 941.42         | 2 |
| 5 | —                | —                | —               | —              | —               | —              | K   | 65.06            | 65.55            | 74.06           | 129.10         | 130.09          | 147.11         | 1 |

| Scan# | Charge | Score | pp   | pp2  | Peptide             |
|-------|--------|-------|------|------|---------------------|
| 1218  | 2      | 51    | 16.7 | 37.9 | [62-66]-s-s-[80-85] |



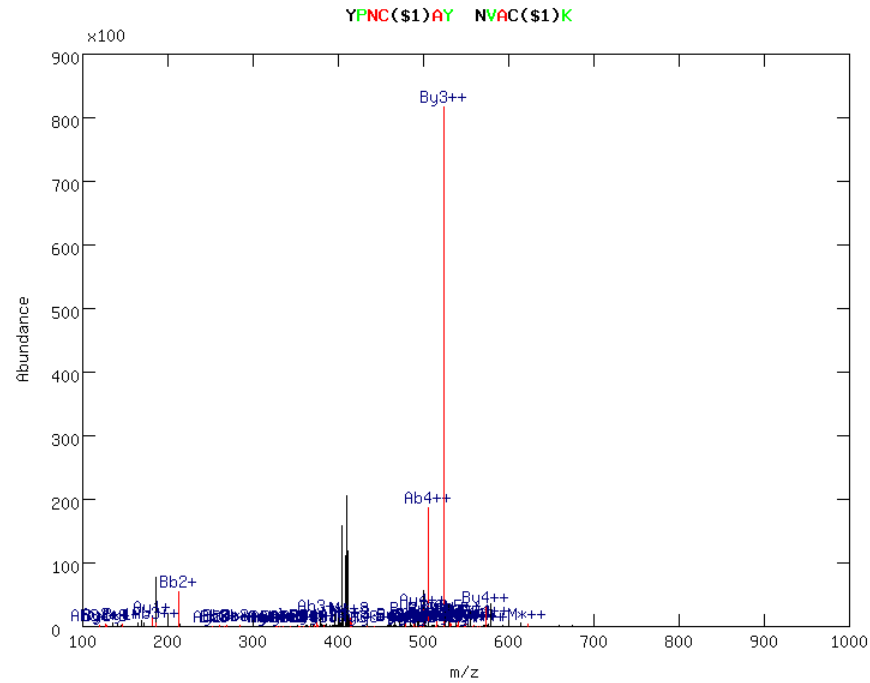

chainA :

| # | b <sup>++3</sup> | b <sup>+3</sup> | b <sup>+3</sup> | b <sup>++</sup> | b <sup>+++</sup> | b <sup>++</sup> | b <sup>++</sup> | b <sup>++</sup> | b <sup>+</sup> | seq | y <sup>++3</sup> | y <sup>++3</sup> | y <sup>+3</sup> | y <sup>++</sup> | y <sup>+++</sup> | y <sup>++</sup> | y <sup>++</sup> | y <sup>++</sup> | y <sup>+</sup> | # |
|---|------------------|-----------------|-----------------|-----------------|------------------|-----------------|-----------------|-----------------|----------------|-----|------------------|------------------|-----------------|-----------------|------------------|-----------------|-----------------|-----------------|----------------|---|
| 1 | —                | —               | 55.36           | —               | —                | 82.54           | —               | —               | 164.07         | Y   | 415.18           | 415.51           | 421.18          | 622.27          | 622.76           | 631.27          | 1243.52         | 1244.51         | 1261.53        | 6 |
| 2 | —                | —               | 87.71           | —               | —                | 131.07          | —               | —               | 261.12         | P   | 360.83           | 361.15           | 366.83          | 540.73          | 541.23           | 549.74          | 1080.46         | 1081.44         | 1098.47        | 5 |
| 3 | —                | 120.05          | 125.73          | —               | 179.57           | 188.09          | —               | 358.14          | 375.17         | N   | 328.47           | 328.80           | 334.48          | 492.21          | 492.70           | 501.21          | 983.41          | 984.39          | 1001.42        | 4 |
| 4 | —                | 331.47          | 337.15          | —               | 496.70           | 505.22          | —               | 992.40          | 1009.42        | C   | 290.46           | 290.79           | 296.46          | 435.19          | 435.68           | 444.19          | 869.36          | 870.35          | 887.38         | 3 |
| 5 | —                | 355.15          | 360.83          | —               | 532.22           | 540.73          | —               | 1063.43         | 1080.46        | A   | 79.04            | —                | 85.04           | 118.06          | —                | 127.06          | 235.11          | —               | 253.12         | 2 |
| 6 | —                | —               | —               | —               | —                | —               | —               | —               | —              | Y   | 55.36            | —                | 61.37           | 82.54           | —                | 91.54           | 164.07          | —               | 182.08         | 1 |

chainB :

| # | b <sup>++3</sup> | b <sup>+3</sup> | b <sup>+3</sup> | b <sup>++</sup> | b <sup>+++</sup> | b <sup>++</sup> | b <sup>++</sup> | b <sup>++</sup> | b <sup>+</sup> | seq | y <sup>++3</sup> | y <sup>++3</sup> | y <sup>+3</sup> | y <sup>++</sup> | y <sup>+++</sup> | y <sup>++</sup> | y <sup>++</sup> | y <sup>++</sup> | y <sup>+</sup> | # |
|---|------------------|-----------------|-----------------|-----------------|------------------|-----------------|-----------------|-----------------|----------------|-----|------------------|------------------|-----------------|-----------------|------------------|-----------------|-----------------|-----------------|----------------|---|
| 1 | —                | 33.35           | 39.02           | —               | 49.52            | 58.03           | —               | 98.02           | 115.05         | N   | —                | —                | —               | —               | —                | —               | —               | —               | —              | 5 |
| 2 | —                | 66.37           | 72.04           | —               | 99.05            | 107.56          | —               | 197.09          | 214.12         | V   | 377.17           | 377.49           | 383.17          | 565.24          | 565.74           | 574.25          | 1129.48         | 1130.47         | 1147.49        | 4 |
| 3 | —                | 90.05           | 95.72           | —               | 134.57           | 143.08          | —               | 268.13          | 285.16         | A   | 344.14           | 344.47           | 350.15          | 515.71          | 516.20           | 524.72          | 1030.41         | 1031.40         | 1048.42        | 3 |
| 4 | —                | 366.81          | 372.48          | —               | 549.71           | 558.22          | —               | 1098.40         | 1115.43        | C   | 320.46           | 320.79           | 326.47          | 480.19          | 480.68           | 489.20          | 959.38          | 960.36          | 977.39         | 2 |
| 5 | —                | —               | —               | —               | —                | —               | —               | —               | —              | K   | 43.71            | 44.03            | 49.71           | 65.06           | 65.55            | 74.06           | 129.10          | 130.09          | 147.11         | 1 |

| Scan# | Charge | Score | pp   | pp2 | Peptide             |
|-------|--------|-------|------|-----|---------------------|
| 1667  | 3      | 11    | 13.7 | 2.6 | [62-66]-s-s-[92-97] |

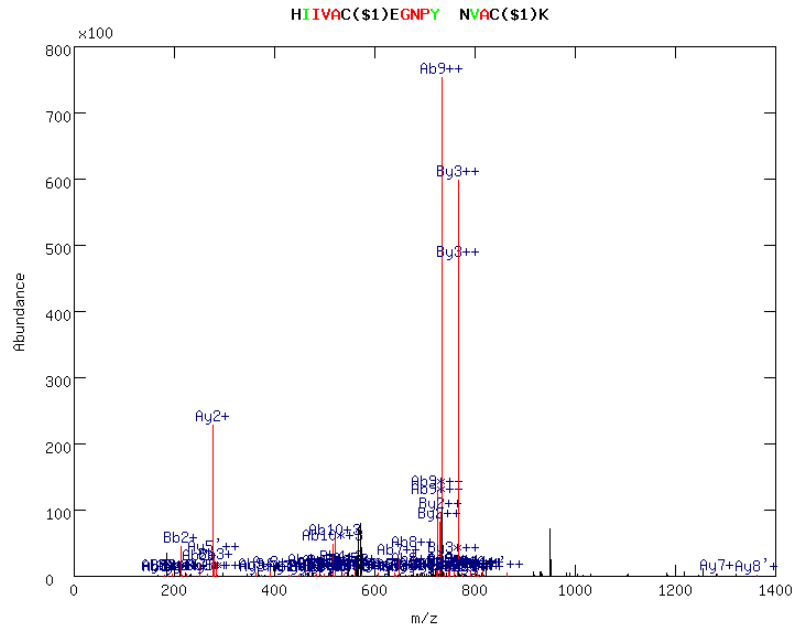

chainA :

| #  | b <sup>++3</sup> | b <sup>++3</sup> | b <sup>+3</sup> | b <sup>++</sup> | b <sup>+</sup> | seq | y <sup>++3</sup> | y <sup>++3</sup> | y <sup>+3</sup> | y <sup>++</sup> | y <sup>+</sup> | #  |
|----|------------------|------------------|-----------------|-----------------|-----------------|-----------------|-----------------|-----------------|----------------|-----|------------------|------------------|-----------------|-----------------|-----------------|-----------------|-----------------|-----------------|----------------|----|
| 1  |                  |                  | 46.69           |                 |                 | 69.54           |                 |                 | 138.07         | H   | 576.95           | 577.27           | 582.95          | <b>864.91</b>   | 865.41          | 873.92          | 1728.82         | 1729.80         | 1746.83        | 11 |
| 2  |                  |                  | 84.39           |                 |                 | 126.08          |                 |                 | <b>251.15</b>  | I   | 531.26           | 531.59           | 537.26          | 796.38          | 796.88          | <b>805.39</b>   | 1591.76         | 1592.75         | 1609.77        | 10 |
| 3  |                  |                  | 122.08          |                 |                 | <b>182.62</b>   |                 |                 | <b>364.23</b>  | I   | <b>493.56</b>    | <b>493.89</b>    | <b>499.57</b>   | <b>739.84</b>   | <b>740.33</b>   | <b>748.85</b>   | 1478.68         | 1479.66         | 1496.69        | 9  |
| 4  |                  |                  | 155.11          |                 |                 | 232.16          |                 |                 | <b>463.30</b>  | V   | 455.87           | 456.20           | 461.87          | <b>683.30</b>   | <b>683.79</b>   | <b>692.31</b>   | <b>1365.59</b>  | 1366.58         | 1383.60        | 8  |
| 5  |                  |                  | 178.79          |                 |                 | <b>267.67</b>   |                 |                 | <b>534.34</b>  | A   | 422.85           | 423.17           | <b>428.85</b>   | 633.77          | 634.26          | <b>642.77</b>   | 1266.52         | 1267.51         | <b>1284.54</b> | 7  |
| 6  | 384.20           | 384.53           | 390.20          | <b>575.80</b>   | 576.29          | 584.80          | 1150.59         | 1151.57         | 1168.60        | C   | 399.17           | 399.50           | 405.17          | 598.25          | 598.74          | <b>607.25</b>   | 1195.49         | 1196.47         | 1213.50        | 6  |
| 7  | 427.21           | 427.54           | <b>433.22</b>   | <b>640.32</b>   | <b>640.81</b>   | <b>649.32</b>   | 1279.63         | 1280.61         | 1297.64        | E   | <b>187.75</b>    | <b>188.08</b>    | 193.75          | <b>281.12</b>   | <b>281.61</b>   | 290.12          | <b>561.23</b>   | <b>562.21</b>   | 579.24         | 5  |
| 8  | 446.22           | 446.55           | 452.23          | <b>668.83</b>   | <b>669.32</b>   | <b>677.83</b>   | 1336.65         | 1337.63         | 1354.66        | G   | 144.73           | 145.06           | 150.74          | <b>216.60</b>   | <b>217.09</b>   | <b>225.60</b>   | 432.19          | <b>433.17</b>   | <b>450.20</b>  | 4  |
| 9  | <b>484.24</b>    | <b>484.56</b>    | <b>490.24</b>   | <b>725.85</b>   | <b>726.34</b>   | <b>734.86</b>   | 1450.69         | 1451.68         | 1468.70        | N   | 125.73           | 126.06           | 131.73          | <b>188.09</b>   | 188.58          | <b>197.09</b>   | <b>375.17</b>   | 376.15          | <b>393.18</b>  | 3  |
| 10 | <b>516.59</b>    | <b>516.92</b>    | <b>522.59</b>   | <b>774.38</b>   | <b>774.87</b>   | <b>783.38</b>   | 1547.75         | 1548.73         | 1565.76        | P   | 87.71            |                  | 93.72           | 131.07          |                 | 140.07          | 261.12          |                 | <b>279.13</b>  | 2  |
| 11 |                  |                  |                 |                 |                 |                 |                 |                 |                | Y   | 55.36            |                  | 61.37           | 82.54           |                 | 91.54           | 164.07          |                 | <b>182.08</b>  | 1  |

chainB :

| # | b <sup>++3</sup> | b <sup>++3</sup> | b <sup>+3</sup> | b <sup>++</sup> | b <sup>+</sup> | seq | y <sup>+3</sup> | y <sup>++3</sup> | y <sup>+3</sup> | y <sup>++</sup> | y <sup>+</sup> | # |
|---|------------------|------------------|-----------------|-----------------|-----------------|-----------------|-----------------|-----------------|----------------|-----|-----------------|------------------|-----------------|-----------------|-----------------|-----------------|-----------------|-----------------|----------------|---|
| 1 |                  | 33.35            | 39.02           |                 | 49.52           | 58.03           |                 | 98.02           | 115.05         | N   |                 |                  |                 |                 |                 |                 |                 |                 |                | 5 |
| 2 |                  | 66.37            | 72.04           |                 | 99.05           | 107.56          |                 | <b>197.09</b>   | <b>214.12</b>  | V   | <b>538.93</b>   | <b>539.26</b>    | <b>544.93</b>   | <b>807.89</b>   | <b>808.38</b>   | <b>816.90</b>   | 1614.78         | 1615.76         | 1632.79        | 4 |
| 3 |                  | 90.05            | 95.72           |                 | 134.57          | 143.08          |                 | <b>268.13</b>   | <b>285.16</b>  | A   | 505.91          | 506.24           | <b>511.91</b>   | <b>758.36</b>   | <b>758.85</b>   | <b>767.36</b>   | 1515.71         | 1516.69         | 1533.72        | 3 |
| 4 |                  | 528.57           | <b>534.25</b>   |                 | <b>792.35</b>   | <b>800.87</b>   |                 | 1583.70         | 1600.73        | C   | <b>482.23</b>   | 482.56           | 488.23          | <b>722.84</b>   | <b>723.33</b>   | <b>731.85</b>   | 1444.67         | 1445.66         | 1462.68        | 2 |
| 5 |                  |                  |                 |                 |                 |                 |                 |                 |                | K   | 43.71           | 44.03            | 49.71           | 65.06           | 65.55           | 74.06           | 129.10          | 130.09          | 147.11         | 1 |

| Scan# | Charge | Score | pp | pp2  | Peptide               |
|-------|--------|-------|----|------|-----------------------|
| 1910  | 3      | 53    | 11 | 17.1 | [62-66]-s-s-[105-115] |

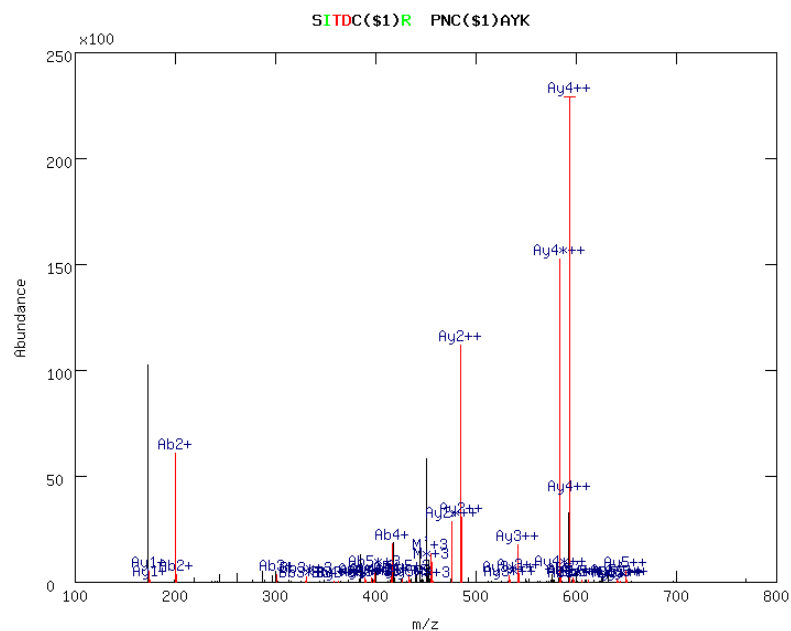

chainA :

| # | b <sup>++3</sup> | b <sup>+++3</sup> | b <sup>+3</sup> | b <sup>+++</sup> | b <sup>+++</sup> | b <sup>++</sup> | b <sup>++</sup> | b <sup>++</sup> | b <sup>+</sup> | seq | y <sup>++3</sup> | y <sup>+++3</sup> | y <sup>+3</sup> | y <sup>+++</sup> | y <sup>+++</sup> | y <sup>++</sup> | y <sup>++</sup> | y <sup>+</sup> | #       |   |
|---|------------------|-------------------|-----------------|------------------|------------------|-----------------|-----------------|-----------------|----------------|-----|------------------|-------------------|-----------------|------------------|------------------|-----------------|-----------------|----------------|---------|---|
| 1 | 24.01            | —                 | 30.02           | 35.52            | —                | 44.52           | 70.03           | —               | 88.04          | S   | 456.87           | 457.20            | 462.88          | 684.81           | 685.30           | 693.81          | 1368.60         | 1369.59        | 1386.61 | 6 |
| 2 | 61.71            | —                 | 67.71           | 92.06            | —                | 101.07          | 183.11          | —               | 201.12         | I   | 427.86           | 428.19            | 433.87          | 641.29           | 641.78           | 650.30          | 1281.57         | 1282.56        | 1299.58 | 5 |
| 3 | 95.39            | —                 | 101.40          | 142.58           | —                | 151.59          | 284.16          | —               | 302.17         | T   | 390.17           | 390.50            | 396.17          | 584.75           | 585.24           | 593.75          | 1168.49         | 1169.47        | 1186.50 | 4 |
| 4 | 133.73           | —                 | 139.74          | 200.10           | —                | 209.10          | 399.19          | —               | 417.20         | D   | 356.49           | 356.81            | 362.49          | 534.22           | 534.72           | 543.23          | 1067.44         | 1068.42        | 1085.45 | 3 |
| 5 | 398.84           | 399.16            | 404.84          | 597.75           | 598.24           | 606.76          | 1194.49         | 1195.48         | 1212.50        | C   | 318.14           | 318.47            | 324.15          | 476.71           | 477.20           | 485.72          | 952.41          | 953.40         | 970.42  | 2 |
| 6 | —                | —                 | —               | —                | —                | —               | —               | —               | —              | R   | 53.04            | 53.37             | 59.05           | 79.06            | 79.55            | 88.06           | 157.11          | 158.09         | 175.12  | 1 |

chainB :

| # | b <sup>++3</sup> | b <sup>+++3</sup> | b <sup>+3</sup> | b <sup>+++</sup> | b <sup>+++</sup> | b <sup>++</sup> | b <sup>++</sup> | b <sup>++</sup> | b <sup>+</sup> | seq | y <sup>++3</sup> | y <sup>+++3</sup> | y <sup>+3</sup> | y <sup>+++</sup> | y <sup>+++</sup> | y <sup>++</sup> | y <sup>++</sup> | y <sup>+</sup> | #       |   |
|---|------------------|-------------------|-----------------|------------------|------------------|-----------------|-----------------|-----------------|----------------|-----|------------------|-------------------|-----------------|------------------|------------------|-----------------|-----------------|----------------|---------|---|
| 1 | —                | —                 | 33.36           | —                | —                | 49.53           | —               | —               | 98.06          | P   | —                | —                 | —               | —                | —                | —               | —               | —              | 6       |   |
| 2 | —                | 65.70             | 71.37           | —                | 98.04            | 106.56          | —               | 195.08          | 212.10         | N   | 424.52           | 424.85            | 430.53          | 636.28           | 636.77           | 645.28          | 1271.55         | 1272.54        | 1289.56 | 5 |
| 3 | —                | 330.47            | 336.14          | —                | 495.19           | 503.71          | —               | 989.38          | 1006.41        | C   | 386.51           | 386.84            | 392.51          | 579.26           | 579.75           | 588.26          | 1157.51         | 1158.49        | 1175.52 | 4 |
| 4 | —                | 354.14            | 359.82          | —                | 530.71           | 539.23          | —               | 1060.42         | 1077.45        | A   | 121.74           | 122.07            | 127.74          | 182.11           | 182.60           | 191.11          | 363.20          | 364.19         | 381.21  | 3 |
| 5 | —                | 408.50            | 414.17          | —                | 612.25           | 620.76          | —               | 1223.48         | 1240.51        | Y   | 98.06            | 98.39             | 104.06          | 146.59           | 147.08           | 155.59          | 292.17          | 293.15         | 310.18  | 2 |
| 6 | —                | —                 | —               | —                | —                | —               | —               | —               | —              | K   | 43.71            | 44.03             | 49.71           | 65.06            | 65.55            | 74.06           | 129.10          | 130.09         | 147.11  | 1 |

| Scan# | Charge | Score | pp | pp2 | Peptide             |
|-------|--------|-------|----|-----|---------------------|
| 1669  | 3      | 24    | 9  | 6.8 | [80-85]-s-s-[93-98] |

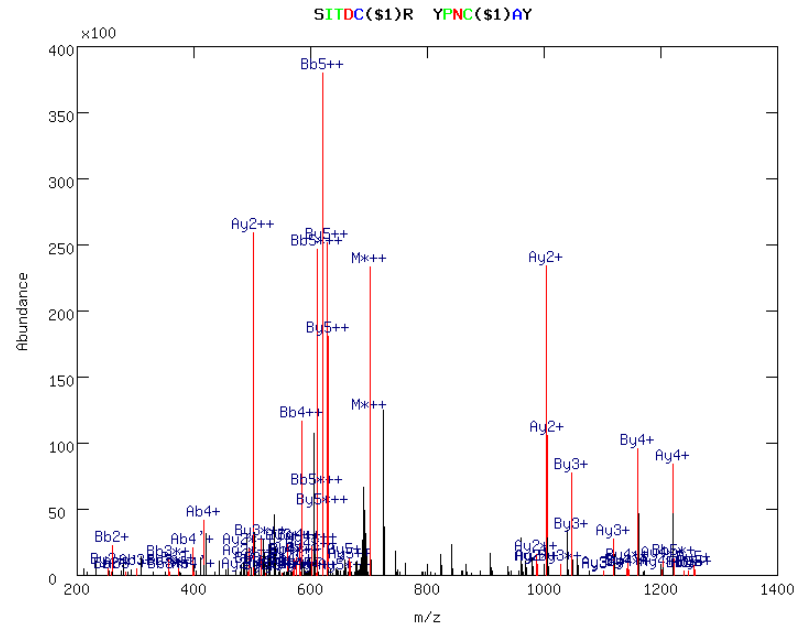

chainA :

| # | b <sup>+++</sup> | b <sup>+++</sup> | b <sup>++</sup> | b <sup>+</sup> | b <sup>++</sup> | b <sup>+</sup> | seq | y <sup>++</sup> | y <sup>+++</sup> | y <sup>++</sup> | y <sup>+</sup> | y <sup>++</sup> | y <sup>+</sup> | # |
|---|------------------|------------------|-----------------|----------------|-----------------|----------------|-----|-----------------|------------------|-----------------|----------------|-----------------|----------------|---|
| 1 | 35.52            | —                | 44.52           | 70.03          | —               | 88.04          | S   | 702.29          | 702.78           | 711.30          | 1403.57        | 1404.56         | 1421.58        | 6 |
| 2 | 92.06            | —                | 101.07          | 183.11         | —               | 201.12         | I   | 658.77          | 659.27           | 667.78          | 1316.54        | 1317.52         | 1334.55        | 5 |
| 3 | 142.58           | —                | 151.59          | 284.16         | —               | 302.17         | T   | 602.23          | 602.72           | 611.24          | 1203.46        | 1204.44         | 1221.47        | 4 |
| 4 | 200.10           | —                | 209.10          | 399.19         | —               | 417.20         | D   | 551.71          | 552.20           | 560.71          | 1102.41        | 1103.39         | 1120.42        | 3 |
| 5 | 615.23           | 615.73           | 624.24          | 1229.46        | 1230.44         | 1247.47        | C   | 494.19          | 494.69           | 503.20          | 987.38         | 988.37          | 1005.39        | 2 |
| 6 | —                | —                | —               | —              | —               | —              | R   | 79.06           | 79.55            | 88.06           | 157.11         | 158.09          | 175.12         | 1 |

chainB :

| # | b <sup>+++</sup> | b <sup>+++</sup> | b <sup>++</sup> | b <sup>+</sup> | b <sup>++</sup> | b <sup>+</sup> | seq | y <sup>++</sup> | y <sup>+++</sup> | y <sup>++</sup> | y <sup>+</sup> | y <sup>++</sup> | y <sup>+</sup> | # |
|---|------------------|------------------|-----------------|----------------|-----------------|----------------|-----|-----------------|------------------|-----------------|----------------|-----------------|----------------|---|
| 1 | —                | —                | 82.54           | —              | —               | 164.07         | Y   | —               | —                | —               | —              | —               | —              | 6 |
| 2 | —                | —                | 131.07          | —              | —               | 261.12         | P   | 620.76          | 621.25           | 629.76          | 1240.51        | 1241.49         | 1258.52        | 5 |
| 3 | —                | 179.57           | 188.09          | —              | 358.14          | 375.17         | N   | 572.23          | 572.72           | 581.24          | 1143.46        | 1144.44         | 1161.47        | 4 |
| 4 | —                | 576.73           | 585.24          | —              | 1152.45         | 1169.47        | C   | 515.21          | 515.70           | 524.22          | 1029.41        | 1030.40         | 1047.42        | 3 |
| 5 | —                | 612.25           | 620.76          | —              | 1223.48         | 1240.51        | A   | 118.06          | —                | 127.06          | 235.11         | —               | 253.12         | 2 |
| 6 | —                | —                | —               | —              | —               | —              | Y   | 82.54           | —                | 91.54           | 164.07         | —               | 182.08         | 1 |

| Scan# | Charge | Score | pp   | pp2  | Peptide             |
|-------|--------|-------|------|------|---------------------|
| 1900  | 2      | 80    | 15.9 | 41.9 | [80-85]-s-s-[92-97] |

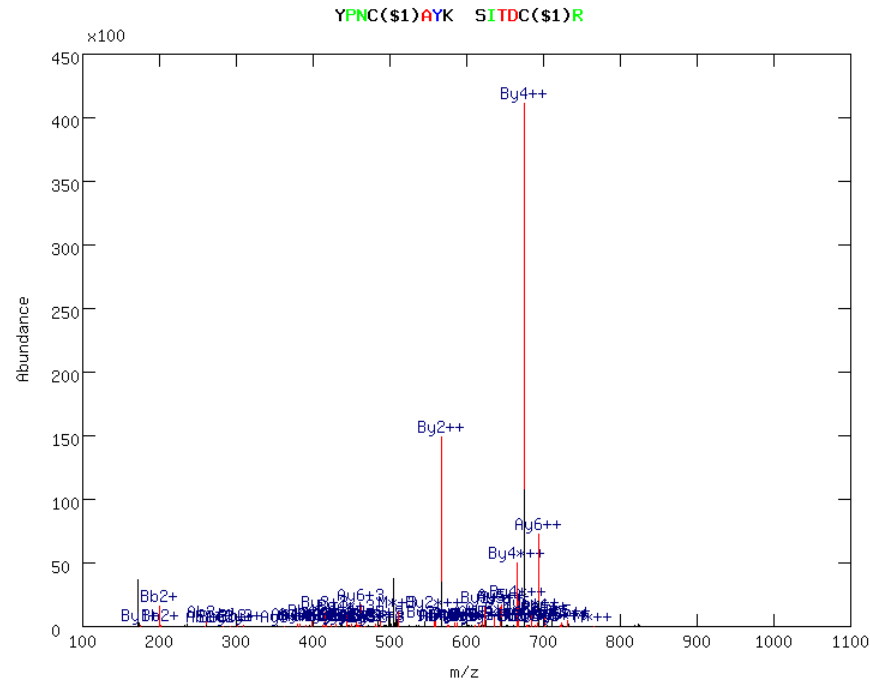

chainA :

| # | b <sup>++3</sup> | b <sup>+++3</sup> | b <sup>+3</sup> | b <sup>++</sup> | b <sup>+++</sup> | b <sup>++</sup> | b <sup>+</sup> | b <sup>++</sup> | b <sup>+</sup> | seq | y <sup>++3</sup> | y <sup>+++3</sup> | y <sup>+3</sup> | y <sup>++</sup> | y <sup>+++</sup> | y <sup>++</sup> | y <sup>+</sup> | y <sup>++</sup> | y <sup>+</sup> | # |
|---|------------------|-------------------|-----------------|-----------------|------------------|-----------------|----------------|-----------------|----------------|-----|------------------|-------------------|-----------------|-----------------|------------------|-----------------|----------------|-----------------|----------------|---|
| 1 | -                | -                 | 55.36           | -               | -                | 82.54           | -              | -               | 164.07         | Y   | 511.23           | 511.56            | 517.23          | 766.34          | 766.83           | 775.34          | 1531.67        | 1532.65         | 1549.68        | 7 |
| 2 | -                | -                 | 87.71           | -               | -                | 131.07          | -              | -               | 261.12         | P   | 456.87           | 457.20            | 462.88          | 684.81          | 685.30           | 693.81          | 1368.60        | 1369.59         | 1386.61        | 6 |
| 3 | -                | 120.05            | 125.73          | -               | 179.57           | 188.09          | -              | 358.14          | 375.17         | N   | 424.52           | 424.85            | 430.53          | 636.28          | 636.77           | 645.28          | 1271.55        | 1272.54         | 1289.56        | 5 |
| 4 | -                | 384.82            | 390.50          | -               | 576.73           | 585.24          | -              | 1152.45         | 1169.47        | C   | 386.51           | 386.84            | 392.51          | 579.26          | 579.75           | 588.26          | 1157.51        | 1158.49         | 1175.52        | 4 |
| 5 | -                | 408.50            | 414.17          | -               | 612.25           | 620.76          | -              | 1223.48         | 1240.51        | A   | 121.74           | 122.07            | 127.74          | 182.11          | 182.60           | 191.11          | 363.20         | 364.19          | 381.21         | 3 |
| 6 | -                | 462.85            | 468.53          | -               | 693.78           | 702.29          | -              | 1386.55         | 1403.57        | Y   | 98.06            | 98.39             | 104.06          | 146.59          | 147.08           | 155.59          | 292.17         | 293.15          | 310.18         | 2 |
| 7 | -                | -                 | -               | -               | -                | -               | -              | -               | -              | K   | 43.71            | 44.03             | 49.71           | 65.06           | 65.55            | 74.06           | 129.10         | 130.09          | 147.11         | 1 |

chainB :

| # | b <sup>++3</sup> | b <sup>+++3</sup> | b <sup>+3</sup> | b <sup>++</sup> | b <sup>+++</sup> | b <sup>++</sup> | b <sup>+</sup> | b <sup>++</sup> | b <sup>+</sup> | seq | y <sup>++3</sup> | y <sup>+++3</sup> | y <sup>+3</sup> | y <sup>++</sup> | y <sup>+++</sup> | y <sup>++</sup> | y <sup>+</sup> | y <sup>++</sup> | y <sup>+</sup> | # |
|---|------------------|-------------------|-----------------|-----------------|------------------|-----------------|----------------|-----------------|----------------|-----|------------------|-------------------|-----------------|-----------------|------------------|-----------------|----------------|-----------------|----------------|---|
| 1 | 24.01            | -                 | 30.02           | 35.52           | -                | 44.52           | 70.03          | -               | 88.04          | S   | -                | -                 | -               | -               | -                | -               | -              | -               | -              | 6 |
| 2 | 61.71            | -                 | 67.71           | 92.06           | -                | 101.07          | 183.11         | -               | 201.12         | I   | 482.22           | 482.54            | 488.22          | 722.82          | 723.31           | 731.83          | 1444.64        | 1445.62         | 1462.65        | 5 |
| 3 | 95.39            | -                 | 101.40          | 142.58          | -                | 151.59          | 284.16         | -               | 302.17         | T   | 444.52           | 444.85            | 450.53          | 666.28          | 666.77           | 675.28          | 1331.55        | 1332.54         | 1349.56        | 4 |
| 4 | 133.73           | -                 | 139.74          | 200.10          | -                | 209.10          | 399.19         | -               | 417.20         | D   | 410.84           | 411.17            | 416.84          | 615.76          | 616.25           | 624.76          | 1230.50        | 1231.49         | 1248.51        | 3 |
| 5 | 453.19           | 453.52            | 459.19          | 679.28          | 679.77           | 688.29          | 1357.56        | 1358.54         | 1375.57        | C   | 372.50           | 372.83            | 378.50          | 558.24          | 558.73           | 567.25          | 1115.48        | 1116.46         | 1133.49        | 2 |
| 6 | -                | -                 | -               | -               | -                | -               | -              | -               | -              | R   | 53.04            | 53.37             | 59.05           | 79.06           | 79.55            | 88.06           | 157.11         | 158.09          | 175.12         | 1 |

| Scan# | Charge | Score | pp   | pp2 | Peptide             |
|-------|--------|-------|------|-----|---------------------|
| 1692  | 3      | 29    | 16.4 | 8   | [80-85]-s-s-[92-98] |

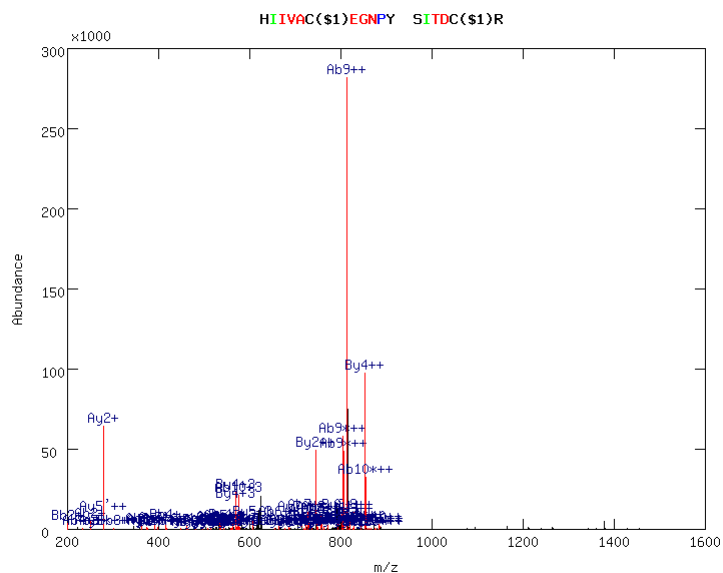

chainA :

| #  | b <sup>++3</sup> | b <sup>++3</sup> | b <sup>+3</sup> | b <sup>++</sup> | b <sup>+</sup> | seq | y <sup>++3</sup> | y <sup>++3</sup> | y <sup>+3</sup> | y <sup>++</sup> | y <sup>+</sup> | #  |
|----|------------------|------------------|-----------------|-----------------|-----------------|-----------------|-----------------|-----------------|----------------|-----|------------------|------------------|-----------------|-----------------|-----------------|-----------------|-----------------|-----------------|----------------|----|
| 1  |                  |                  | 46.69           |                 |                 | 69.54           |                 |                 | 138.07         | H   | 630.29           | 630.62           | 636.30          | 944.94          | 945.43          | 953.94          | 1888.87         | 1889.85         | 1906.88        | 11 |
| 2  |                  |                  | 84.39           |                 |                 | 126.08          |                 |                 | 251.15         | I   | 584.61           | 584.94           | 590.61          | 876.41          | 876.90          | 885.41          | 1751.81         | 1752.79         | 1769.82        | 10 |
| 3  |                  |                  | 122.08          |                 |                 | 182.62          |                 |                 | 364.23         | I   | 546.91           | 547.24           | 552.92          | 819.87          | 820.36          | 828.87          | 1638.73         | 1639.71         | 1656.74        | 9  |
| 4  |                  |                  | 155.11          |                 |                 | 232.16          |                 |                 | 463.30         | V   | 509.22           | 509.55           | 515.22          | 763.32          | 763.82          | 772.33          | 1525.64         | 1526.63         | 1543.65        | 8  |
| 5  |                  |                  | 178.79          |                 |                 | 267.67          |                 |                 | 534.34         | A   | 476.20           | 476.52           | 482.20          | 713.79          | 714.28          | 722.80          | 1426.57         | 1427.56         | 1444.58        | 7  |
| 6  | 437.55           | 437.88           | 443.55          | 655.82          | 656.31          | 664.83          | 1310.63         | 1311.62         | 1328.65        | C   | 452.52           | 452.85           | 458.52          | 678.27          | 678.76          | 687.28          | 1355.54         | 1356.52         | 1373.55        | 6  |
| 7  | 480.56           | 480.89           | 486.57          | 720.34          | 720.83          | 729.35          | 1439.68         | 1440.66         | 1457.69        | E   | 187.75           | 188.08           | 193.75          | 281.12          | 281.61          | 290.12          | 561.23          | 562.21          | 579.24         | 5  |
| 8  | 499.57           | 499.90           | 505.58          | 748.85          | 749.35          | 757.86          | 1496.70         | 1497.68         | 1514.71        | G   | 144.73           | 145.06           | 150.74          | 216.60          | 217.09          | 225.60          | 432.19          | 433.17          | 450.20         | 4  |
| 9  | 537.59           | 537.91           | 543.59          | 805.87          | 806.37          | 814.88          | 1610.74         | 1611.73         | 1628.75        | N   | 125.73           | 126.06           | 131.73          | 188.09          | 188.58          | 197.09          | 375.17          | 376.15          | 393.18         | 3  |
| 10 | 569.94           | 570.26           | 575.94          | 854.40          | 854.89          | 863.41          | 1707.79         | 1708.78         | 1725.81        | P   | 87.71            |                  | 93.72           | 131.07          |                 | 140.07          | 261.12          |                 | 279.13         | 2  |
| 11 |                  |                  |                 |                 |                 |                 |                 |                 |                | Y   | 55.36            |                  | 61.37           | 82.54           |                 | 91.54           | 164.07          |                 | 182.08         | 1  |

chainB :

| # | b <sup>++3</sup> | b <sup>++3</sup> | b <sup>+3</sup> | b <sup>++</sup> | b <sup>+</sup> | seq | y <sup>++3</sup> | y <sup>++3</sup> | y <sup>+3</sup> | y <sup>++</sup> | y <sup>+</sup> | # |
|---|------------------|------------------|-----------------|-----------------|-----------------|-----------------|-----------------|-----------------|----------------|-----|------------------|------------------|-----------------|-----------------|-----------------|-----------------|-----------------|-----------------|----------------|---|
| 1 | 24.01            |                  | 30.02           | 35.52           |                 | 44.52           | 70.03           |                 | 88.04          | S   |                  |                  |                 |                 |                 |                 |                 |                 |                | 6 |
| 2 | 61.71            |                  | 67.71           | 92.06           |                 | 101.07          | 183.11          |                 | 201.12         | I   | 601.28           | 601.61           | 607.29          | 901.42          | 901.91          | 910.43          | 1801.84         | 1802.82         | 1819.85        | 5 |
| 3 | 95.39            |                  | 101.40          | 142.58          |                 | 151.59          | 284.16          |                 | 302.17         | T   | 563.59           | 563.92           | 569.59          | 844.88          | 845.37          | 853.89          | 1688.75         | 1689.74         | 1706.76        | 4 |
| 4 | 133.73           |                  | 139.74          | 200.10          |                 | 209.10          | 399.19          |                 | 417.20         | D   | 529.91           | 530.23           | 535.91          | 794.36          | 794.85          | 803.36          | 1587.70         | 1588.69         | 1605.72        | 3 |
| 5 | 572.26           | 572.59           | 578.26          | 857.88          | 858.37          | 866.89          | 1714.76         | 1715.74         | 1732.77        | C   | 491.56           | 491.89           | 497.57          | 736.84          | 737.33          | 745.85          | 1472.68         | 1473.66         | 1490.69        | 2 |
| 6 |                  |                  |                 |                 |                 |                 |                 |                 |                | R   | 53.04            | 53.37            | 59.05           | 79.06           | 79.55           | 88.06           | 157.11          | 158.09          | 175.12         | 1 |

| Scan# | Charge | Score | pp   | pp2 | Peptide               |
|-------|--------|-------|------|-----|-----------------------|
| 2060  | 3      | 42    | 11.4 | 16  | [80-85]-s-s-[105-115] |

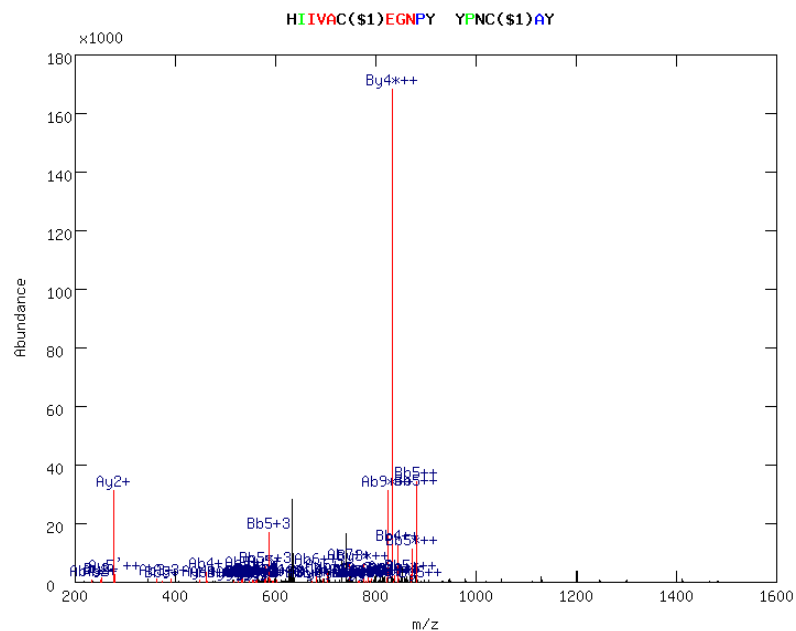

chainA :

| #  | b <sup>++3</sup> | b <sup>++3</sup> | b <sup>+3</sup> | b <sup>+++</sup> | b <sup>+++</sup> | b <sup>++</sup> | b <sup>++</sup> | b <sup>++</sup> | b <sup>+</sup> | seq | y <sup>++3</sup> | y <sup>++3</sup> | y <sup>+3</sup> | y <sup>+++</sup> | y <sup>+++</sup> | y <sup>++</sup> | y <sup>++</sup> | y <sup>++</sup> | y <sup>+</sup> | #  |
|----|------------------|------------------|-----------------|------------------|------------------|-----------------|-----------------|-----------------|----------------|-----|------------------|------------------|-----------------|------------------|------------------|-----------------|-----------------|-----------------|----------------|----|
| 1  | -                | -                | 46.69           | -                | -                | 69.54           | -               | -               | 138.07         | H   | 642.28           | 642.61           | 648.29          | 962.92           | 963.41           | 971.93          | 1924.84         | 1925.82         | 1942.85        | 11 |
| 2  | -                | -                | 84.39           | -                | -                | 126.08          | -               | -               | 251.15         | I   | 596.60           | 596.93           | 602.60          | 894.39           | 894.88           | 903.40          | 1787.78         | 1788.76         | 1805.79        | 10 |
| 3  | -                | -                | 122.08          | -                | -                | 182.62          | -               | -               | 364.23         | I   | 558.90           | 559.23           | 564.91          | 837.85           | 838.34           | 846.86          | 1674.69         | 1675.68         | 1692.70        | 9  |
| 4  | -                | -                | 155.11          | -                | -                | 232.16          | -               | -               | 463.30         | V   | 521.21           | 521.54           | 527.21          | 781.31           | 781.80           | 790.31          | 1561.61         | 1562.59         | 1579.62        | 8  |
| 5  | -                | -                | 178.79          | -                | -                | 267.67          | -               | -               | 534.34         | A   | 488.19           | 488.51           | 494.19          | 731.77           | 732.27           | 740.78          | 1462.54         | 1463.52         | 1480.55        | 7  |
| 6  | 449.54           | 449.87           | 455.54          | 673.81           | 674.30           | 682.81          | 1346.60         | 1347.59         | 1364.61        | C   | 464.51           | 464.83           | 470.51          | 696.26           | 696.75           | 705.26          | 1391.50         | 1392.49         | 1409.51        | 6  |
| 7  | 492.55           | 492.88           | 498.56          | 738.33           | 738.82           | 747.33          | 1475.65         | 1476.63         | 1493.66        | E   | 187.75           | 188.08           | 193.75          | 281.12           | 281.61           | 290.12          | 561.23          | 562.21          | 579.24         | 5  |
| 8  | 511.56           | 511.89           | 517.56          | 766.84           | 767.33           | 775.84          | 1532.67         | 1533.65         | 1550.68        | G   | 144.73           | 145.06           | 150.74          | 216.60           | 217.09           | 225.60          | 432.19          | 433.17          | 450.20         | 4  |
| 9  | 549.58           | 549.90           | 555.58          | 823.86           | 824.35           | 832.86          | 1646.71         | 1647.69         | 1664.72        | N   | 125.73           | 126.06           | 131.73          | 188.09           | 188.58           | 197.09          | 375.17          | 376.15          | 393.18         | 3  |
| 10 | 581.93           | 582.25           | 587.93          | 872.39           | 872.88           | 881.39          | 1743.76         | 1744.75         | 1761.77        | P   | 87.71            | -                | 93.72           | 131.07           | -                | 140.07          | 261.12          | -               | 279.13         | 2  |
| 11 | -                | -                | -               | -                | -                | -               | -               | -               | -              | Y   | 55.36            | -                | 61.37           | 82.54            | -                | 91.54           | 164.07          | -               | 182.08         | 1  |

chainB :

| # | b <sup>++3</sup> | b <sup>++3</sup> | b <sup>+3</sup> | b <sup>+++</sup> | b <sup>+++</sup> | b <sup>++</sup> | b <sup>++</sup> | b <sup>++</sup> | b <sup>+</sup> | seq | y <sup>++3</sup> | y <sup>++3</sup> | y <sup>+3</sup> | y <sup>+++</sup> | y <sup>+++</sup> | y <sup>++</sup> | y <sup>++</sup> | y <sup>++</sup> | y <sup>+</sup> | # |
|---|------------------|------------------|-----------------|------------------|------------------|-----------------|-----------------|-----------------|----------------|-----|------------------|------------------|-----------------|------------------|------------------|-----------------|-----------------|-----------------|----------------|---|
| 1 | -                | -                | 55.36           | -                | -                | 82.54           | -               | -               | 164.07         | Y   | -                | -                | -               | -                | -                | -               | -               | -               | -              | 6 |
| 2 | -                | -                | 87.71           | -                | -                | 131.07          | -               | -               | 261.12         | P   | 587.93           | 588.26           | 593.93          | 881.39           | 881.88           | 890.40          | 1761.77         | 1762.76         | 1779.78        | 5 |
| 3 | -                | 120.05           | 125.73          | -                | 179.57           | 188.09          | -               | 358.14          | 375.17         | N   | 555.58           | 555.91           | 561.58          | 832.86           | 833.36           | 841.87          | 1664.72         | 1665.70         | 1682.73        | 4 |
| 4 | -                | 558.57           | 564.25          | -                | 837.36           | 845.87          | -               | 1673.71         | 1690.74        | C   | 517.56           | 517.89           | 523.57          | 775.84           | 776.33           | 784.85          | 1550.68         | 1551.66         | 1568.69        | 3 |
| 5 | -                | 582.25           | 587.93          | -                | 872.88           | 881.39          | -               | 1744.75         | 1761.77        | A   | 79.04            | -                | 85.04           | 118.06           | -                | 127.06          | 235.11          | -               | 253.12         | 2 |
| 6 | -                | -                | -               | -                | -                | -               | -               | -               | -              | Y   | 55.36            | -                | 61.37           | 82.54            | -                | 91.54           | 164.07          | -               | 182.08         | 1 |

| Scan# | Charge | Score | pp  | pp2 | Peptide               |
|-------|--------|-------|-----|-----|-----------------------|
| 2159  | 3      | 22    | 2.9 | 6.7 | [92-97]-s-s-[105-115] |

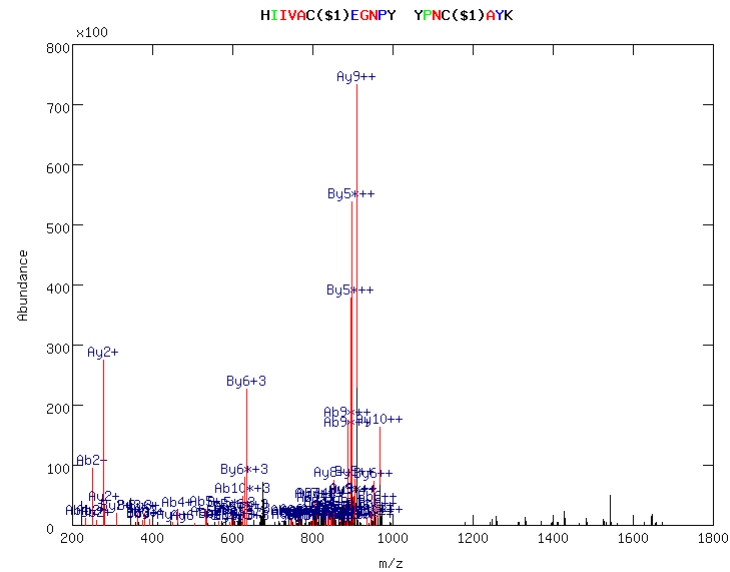

chainA :

| #  | b <sup>++3</sup> | b <sup>++3</sup> | b <sup>+3</sup> | b <sup>++</sup> | b <sup>+</sup> | seq | y <sup>++3</sup> | y <sup>++3</sup> | y <sup>+3</sup> | y <sup>++</sup> | y <sup>+</sup> | #  |
|----|------------------|------------------|-----------------|-----------------|-----------------|-----------------|-----------------|-----------------|----------------|-----|------------------|------------------|-----------------|-----------------|-----------------|-----------------|-----------------|-----------------|----------------|----|
| 1  |                  |                  | 46.69           |                 |                 | 69.54           |                 |                 | 138.07         | H   | 684.98           | 685.31           | 690.99          | 1026.97         | 1027.46         | 1035.97         | 2052.93         | 2053.92         | 2070.94        | 11 |
| 2  |                  |                  | 84.39           |                 |                 | 126.08          |                 |                 | 251.15         | I   | 639.30           | 639.62           | 645.30          | 958.44          | 958.93          | 967.45          | 1915.87         | 1916.86         | 1933.88        | 10 |
| 3  |                  |                  | 122.08          |                 |                 | 182.62          |                 |                 | 364.23         | I   | 601.60           | 601.93           | 607.60          | 901.90          | 902.39          | 910.90          | 1802.79         | 1803.77         | 1820.80        | 9  |
| 4  |                  |                  | 155.11          |                 |                 | 232.16          |                 |                 | 463.30         | V   | 563.91           | 564.23           | 569.91          | 845.36          | 845.85          | 854.36          | 1689.70         | 1690.69         | 1707.71        | 8  |
| 5  |                  |                  | 178.79          |                 |                 | 267.67          |                 |                 | 534.34         | A   | 530.88           | 531.21           | 536.89          | 795.82          | 796.31          | 804.83          | 1590.64         | 1591.62         | 1608.65        | 7  |
| 6  | 492.24           | 492.57           | 498.24          | 737.85          | 738.34          | 746.86          | 1474.70         | 1475.68         | 1492.71        | C   | 507.20           | 507.53           | 513.21          | 760.30          | 760.80          | 769.31          | 1519.60         | 1520.58         | 1537.61        | 6  |
| 7  | 535.25           | 535.58           | 541.26          | 802.37          | 802.87          | 811.38          | 1603.74         | 1604.72         | 1621.75        | E   | 187.75           | 188.08           | 193.75          | 281.12          | 281.61          | 290.12          | 561.23          | 562.21          | 579.24         | 5  |
| 8  | 554.26           | 554.59           | 560.26          | 830.88          | 831.38          | 839.89          | 1660.76         | 1661.75         | 1678.77        | G   | 144.73           | 145.06           | 150.74          | 216.60          | 217.09          | 225.60          | 432.19          | 433.17          | 450.20         | 4  |
| 9  | 592.27           | 592.60           | 598.28          | 887.91          | 888.40          | 896.91          | 1774.80         | 1775.79         | 1792.82        | N   | 125.73           | 126.06           | 131.73          | 188.09          | 188.58          | 197.09          | 375.17          | 376.15          | 393.18         | 3  |
| 10 | 624.62           | 624.95           | 630.63          | 936.43          | 936.92          | 945.44          | 1871.86         | 1872.84         | 1889.87        | P   | 87.71            |                  | 93.72           | 131.07          |                 | 140.07          | 261.12          |                 | 279.13         | 2  |
| 11 |                  |                  |                 |                 |                 |                 |                 |                 |                | Y   | 55.36            |                  | 61.37           | 82.54           |                 | 91.54           | 164.07          |                 | 182.08         | 1  |

chainB :

| # | b <sup>++3</sup> | b <sup>++3</sup> | b <sup>+3</sup> | b <sup>++</sup> | b <sup>+</sup> | seq | y <sup>++3</sup> | y <sup>++3</sup> | y <sup>+3</sup> | y <sup>++</sup> | y <sup>+</sup> | # |
|---|------------------|------------------|-----------------|-----------------|-----------------|-----------------|-----------------|-----------------|----------------|-----|------------------|------------------|-----------------|-----------------|-----------------|-----------------|-----------------|-----------------|----------------|---|
| 1 |                  |                  | 55.36           |                 |                 | 82.54           |                 |                 | 164.07         | Y   |                  |                  |                 |                 |                 |                 |                 |                 |                | 7 |
| 2 |                  |                  | 87.71           |                 |                 | 131.07          |                 |                 | 261.12         | P   | 630.63           | 630.96           | 636.63          | 945.44          | 945.93          | 954.44          | 1889.87         | 1890.85         | 1907.88        | 6 |
| 3 |                  | 120.05           | 125.73          |                 | 179.57          | 188.09          |                 | 358.14          | 375.17         | N   | 598.28           | 598.60           | 604.28          | 896.91          | 897.40          | 905.92          | 1792.82         | 1793.80         | 1810.83        | 5 |
| 4 |                  | 558.57           | 564.25          |                 | 837.36          | 845.87          |                 | 1673.71         | 1690.74        | C   | 560.26           | 560.59           | 566.27          | 839.89          | 840.38          | 848.90          | 1678.77         | 1679.76         | 1696.78        | 4 |
| 5 |                  | 582.25           | 587.93          |                 | 872.88          | 881.39          |                 | 1744.75         | 1761.77        | A   | 121.74           | 122.07           | 127.74          | 182.11          | 182.60          | 191.11          | 363.20          | 364.19          | 381.21         | 3 |
| 6 |                  | 636.61           | 642.28          |                 | 954.41          | 962.92          |                 | 1907.81         | 1924.84        | Y   | 98.06            | 98.39            | 104.06          | 146.59          | 147.08          | 155.59          | 292.17          | 293.15          | 310.18         | 2 |
| 7 |                  |                  |                 |                 |                 |                 |                 |                 |                | K   | 43.71            | 44.03            | 49.71           | 65.06           | 65.55           | 74.06           | 129.10          | 130.09          | 147.11         | 1 |

| Scan# | Charge | Score | pp  | pp2  | Peptide               |
|-------|--------|-------|-----|------|-----------------------|
| 2050  | 3      | 50    | 3.5 | 12.9 | [92-98]-s-s-[105-115] |
