# Supplementary material
Source: PubMed Central journal article supplement (PMC2749473)
Supplement: NIHMS73818-supplement-Supplemental_Figure_2.pdf [file NIHMS73818-supplement-Supplemental_Figure_2.pdf]

## Disulfide bonds for RNaseA mapped by tandem MS experiments and subsequent database search in MassMatrix under different conditions

|             |              |              |              |              |            |            |            |
|-------------|--------------|--------------|--------------|--------------|------------|------------|------------|
| <b>C40</b>  | 69.3         |              |              |              |            |            |            |
| <b>C58</b>  | --           | 13.1         |              |              |            |            |            |
| <b>C65</b>  | --           | 107.8        | 10.4         |              |            |            |            |
| <b>C72</b>  | --           | --           | --           | <b>807.6</b> |            |            |            |
| <b>C84</b>  | <b>554.9</b> | 27.8         | --           | 48.6         | --         |            |            |
| <b>C95</b>  | 89.7         | <b>629.3</b> | 25.7         | 56.4         | --         | 286.2      |            |
| <b>C110</b> | 32.4         | 51.8         | <b>112.7</b> | 36.3         | --         | 38.1       | 11.6       |
|             | <b>C26</b>   | <b>C40</b>   | <b>C58</b>   | <b>C65</b>   | <b>C72</b> | <b>C84</b> | <b>C95</b> |

pH = 8.0 without iodoacetamide

|             |              |              |              |              |            |            |            |
|-------------|--------------|--------------|--------------|--------------|------------|------------|------------|
| <b>C40</b>  | 75.8         |              |              |              |            |            |            |
| <b>C58</b>  | 23.2         | 141.9        |              |              |            |            |            |
| <b>C65</b>  | --           | 72.9         | 149.3        |              |            |            |            |
| <b>C72</b>  | 144.6        | --           | 168          | <b>941.8</b> |            |            |            |
| <b>C84</b>  | <b>302.9</b> | 81.1         | 107.3        | 19.8         | 107.8      |            |            |
| <b>C95</b>  | 19.7         | <b>172.8</b> | 60.4         | 10.8         | --         | 515.9      |            |
| <b>C110</b> | 111.1        | 254.2        | <b>369.5</b> | 123.7        | --         | 140.3      | 251        |
|             | <b>C26</b>   | <b>C40</b>   | <b>C58</b>   | <b>C65</b>   | <b>C72</b> | <b>C84</b> | <b>C95</b> |

pH = 8.0 without iodoacetamide (thermally denatured)

|             |            |            |              |              |            |            |            |
|-------------|------------|------------|--------------|--------------|------------|------------|------------|
| <b>C40</b>  | --         |            |              |              |            |            |            |
| <b>C58</b>  | --         | 18         |              |              |            |            |            |
| <b>C65</b>  | --         | --         | 27           |              |            |            |            |
| <b>C72</b>  | --         | 24.7       | --           | <b>222.9</b> |            |            |            |
| <b>C84</b>  | <b>27</b>  | 67.7       | --           | 23.5         | --         |            |            |
| <b>C95</b>  | --         | <b>151</b> | 20.5         | 8.7          | --         | 42.3       |            |
| <b>C110</b> | --         | 21         | <b>300.2</b> | --           | --         | --         | 12.9       |
|             | <b>C26</b> | <b>C40</b> | <b>C58</b>   | <b>C65</b>   | <b>C72</b> | <b>C84</b> | <b>C95</b> |

pH = 8.0 with iodoacetamide

|             |              |              |              |             |            |            |            |
|-------------|--------------|--------------|--------------|-------------|------------|------------|------------|
| <b>C40</b>  | --           |              |              |             |            |            |            |
| <b>C58</b>  | --           | --           |              |             |            |            |            |
| <b>C65</b>  | --           | --           | --           |             |            |            |            |
| <b>C72</b>  | --           | --           | --           | <b>79.3</b> |            |            |            |
| <b>C84</b>  | <b>431.6</b> | --           | --           | --          | --         |            |            |
| <b>C95</b>  | --           | <b>386.4</b> | --           | --          | --         | 121.4      |            |
| <b>C110</b> | --           | --           | <b>129.8</b> | --          | --         | --         | --         |
|             | <b>C26</b>   | <b>C40</b>   | <b>C58</b>   | <b>C65</b>  | <b>C72</b> | <b>C84</b> | <b>C95</b> |

pH = 6.0 without iodoacetamide
